# Supplementary material for: ABCC1, ABCG2 and FOXP3: Predictive Biomarkers of Toxicity from Methotrexate Treatment in Patients Diagnosed with Moderate-to-Severe Psoriasis
Source: MDPI journal article supplement (doi:10.3390/biomedicines11092567), 2023-09-19
Supplement: s1 [file s1]

Table S21. Single nucleotide polymorphisms and nephrotoxicity.

| Gen          | SNP        | Genotype | N  | Nephrotoxicity |                             | $\chi^2$ | p-value | OR | IC <sub>95%</sub> |
|--------------|------------|----------|----|----------------|-----------------------------|----------|---------|----|-------------------|
|              |            |          |    | NO<br>N (%)    | YES<br>(Grade 1-4)<br>N (%) |          |         |    |                   |
| <i>ABCC1</i> | rs246240   | AA       | 74 | 73(98.6)       | 1(1.4)                      | -        | 1*      | -  | -                 |
|              |            | AG       | 24 | 24(100.0)      | 0(0.0)                      |          |         |    |                   |
|              |            | GG       | 3  | 3(100.0)       | 0(0.0)                      |          |         |    |                   |
|              |            | A        | 98 | 97(99.0)       | 1(1.0)                      | -        | 1*      | -  | -                 |
|              |            | G        | 27 | 27(100.0)      | 0(0.0)                      | -        | 1*      | -  | -                 |
|              | rs35592    | CC       | 3  | 3(100.0)       | 0(0.0)                      | -        | 1*      | -  | -                 |
|              |            | CT       | 40 | 40(100.0)      | 0(0.0)                      |          |         |    |                   |
|              |            | TT       | 58 | 57(98.3)       | 1(1.7)                      |          |         |    |                   |
|              |            | C        | 43 | 43(100.0)      | 0(0.0)                      | -        | 1*      | -  | -                 |
|              |            | T        | 98 | 97(99.0)       | 1(1.0)                      | -        | 1*      | -  | -                 |
|              | rs2238476  | GG       | 91 | 91(100.0)      | 0(0.0)                      | -        | 0.099*  | -  | -                 |
|              |            | AG       | 10 | 9(90.0)        | 1(10.0)                     |          |         | -  | -                 |
|              |            | A        | 10 | 9(90.0)        | 1(10.0)                     | -        | 0.099*  | -  | -                 |
| <i>ABCG2</i> | rs13120400 | TT       | 53 | 53(100.0)      | 0(0.0)                      | -        | 0.475*  | -  | -                 |
|              |            | CT       | 42 | 41(97.6)       | 1(2.4)                      |          |         |    |                   |
|              |            | CC       | 6  | 6(100.0)       | 0(0.0)                      |          |         |    |                   |
|              |            | T        | 95 | 94(98.9)       | 1(1.1)                      | -        | 1*      | -  | -                 |
|              |            | C        | 48 | 47(97.9)       | 1(2.1)                      | -        | 0.475*  | -  | -                 |
| <i>FOXP3</i> | rs3761548  | GG       | 40 | 40 (100.0)     | 0 (0.0)                     | -        | 0.287*  | -  | -                 |
|              |            | GT       | 29 | 28 (96.6)      | 1 (3.4)                     |          |         |    |                   |
|              |            | TT       | 32 | 32 (100.0)     | 0 (0.0)                     |          |         |    |                   |
|              |            | G        | 61 | 60 (98.4)      | 1 (1.6)                     | -        | 1*      | -  | -                 |
|              |            | T        | 69 | 68 (98.6)      | 1 (1.4)                     | -        | 1*      | -  | -                 |

\*p-value by Fisher's test.
