# Supplementary material for: ABCC1, ABCG2 and FOXP3: Predictive Biomarkers of Toxicity from Methotrexate Treatment in Patients Diagnosed with Moderate-to-Severe Psoriasis
Source: MDPI journal article supplement (doi:10.3390/biomedicines11092567), 2023-09-19
Supplement: s1 [file s1]

Table S11. Clinical variables and nephrotoxicity

| Characteristics             | N   | Nephrotoxicity   |                             | $\chi^2$ | p-value   | OR | IC <sub>95%</sub> |
|-----------------------------|-----|------------------|-----------------------------|----------|-----------|----|-------------------|
|                             |     | NO<br>N (%)      | YES<br>(Grade 1-4)<br>N (%) |          |           |    |                   |
| <b>Gender</b>               | 101 |                  |                             |          |           |    |                   |
| Female                      | 52  | 51(98.1)         | 1(1.9)                      | -        | <b>1*</b> | -  | -                 |
| Male                        | 49  | 49(100.0)        | 0(0.0)                      |          |           |    |                   |
| <b>Age diagnosis PS</b>     | 101 | 27.1 (18.3-43.6) | 48.8 (48.8-48.8)            | -        | <b>1*</b> | -  | -                 |
| <b>Family History of Ps</b> | 101 |                  |                             |          |           |    |                   |
| Yes                         | 52  | 52 (100.0)       | 0 (0.0)                     | -        | 0.485*    | -  | -                 |
| No                          | 49  | 48 (98.0)        | 1 (2.0)                     |          |           |    |                   |
| <b>Smoking</b>              | 101 |                  |                             |          |           |    |                   |
| Smoker                      | 31  | 31 (100.0)       | 0 (0.0)                     | -        | <b>1*</b> | -  | -                 |
| Non-smoking                 | 49  | 48 (92.0)        | 1 (2.0)                     |          |           |    |                   |
| Former Smoker               | 21  | 21 (100.0)       | 0 (0.0)                     |          |           |    |                   |
| <b>Alcoholic drinking</b>   | 101 |                  |                             |          |           |    |                   |
| Drinker                     | 38  | 38 (100.0)       | 0 (0.0)                     | -        | <b>1*</b> | -  | -                 |
| Non-drinker                 | 61  | 60 (98.4)        | 1 (1.6)                     |          |           |    |                   |
| Former Drinker              | 2   | 2 (100.0)        | 0 (0.0)                     |          |           |    |                   |
| <b>Type of Psoriasis</b>    | 101 |                  |                             |          |           |    |                   |
| Plaque                      | 74  | 73(98.6)         | 1(1.4)                      | -        | <b>1*</b> | -  | -                 |
| Pustular                    | 5   | 5(100.0)         | 0(0.0)                      |          |           |    |                   |
| Inverse                     | 1   | 1(100.0)         | 0(0.0)                      |          |           |    |                   |
| Guttate                     | 5   | 5(100.0)         | 0(0.0)                      |          |           |    |                   |
| Plaque and guttate          | 12  | 12(100.0)        | 0(0.0)                      |          |           |    |                   |
| Plaque and inverse          | 2   | 2(100.0)         | 0(0.0)                      |          |           |    |                   |
| Plaque and pustular         | 1   | 1(100.0)         | 0(0.0)                      |          |           |    |                   |
| Plaque, guttate and inverse | 1   | 1(100.0)         | 0(0.0)                      |          |           |    |                   |
| <b>Localization</b>         |     |                  |                             |          |           |    |                   |
| <b>Trunk and limbs</b>      | 101 |                  |                             |          |           |    |                   |
| Yes                         | 93  | 92 (98.9)        | 1(1.1)                      | -        | <b>1*</b> | -  | -                 |
| No                          | 8   | 8(100.0)         | 0(0.0)                      |          |           |    |                   |
| <b>Scalp and face</b>       | 101 |                  |                             |          |           |    |                   |
| Yes                         | 77  | 76(98.7)         | 1(1.3)                      | -        | <b>1*</b> | -  | -                 |
| No                          | 24  | 24(100.0)        | 0(0.0)                      |          |           |    |                   |
| <b>Nails</b>                | 101 |                  |                             |          |           |    |                   |
| Yes                         | 58  | 57(98.3)         | 1(1.7)                      | -        | <b>1*</b> | -  |                   |
| No                          | 43  | 43(100.0)        | 0(0.0)                      |          |           |    |                   |
| <b>Palmoplantar</b>         | 101 |                  |                             |          |           |    |                   |
| Yes                         | 19  | 19(100.0)        | 0(0.0)                      | -        | <b>1*</b> | -  | -                 |
| No                          | 82  | 81(98.8)         | 1(1.2)                      |          |           |    |                   |
| <b>Flexures</b>             | 101 |                  |                             |          |           |    |                   |
| Yes                         | 28  | 28 (100.0)       | 0 (0.0)                     | -        | <b>1*</b> | -  | -                 |
| No                          | 73  | 72 (98.6)        | 1 (1.4)                     |          |           |    |                   |
| <b>Development of PSA</b>   | 101 |                  |                             |          |           |    |                   |
| Yes                         | 31  | 30(96.8)         | 1(3.2)                      | -        | 0.307*    | -  | -                 |
| No                          | 70  | 70(100.0)        | 0(0.0)                      |          |           |    |                   |
| <b>Comorbidities</b>        |     |                  |                             |          |           |    |                   |
|                             | 101 |                  |                             |          |           |    |                   |
| Yes                         | 57  | 56(98.2)         | 1(1.8)                      | -        | <b>1*</b> | -  | -                 |
| No                          | 44  | 44(100.0)        | 0(0.0)                      |          |           |    |                   |
| <b>Age of onset of MTX</b>  | 101 | 45.47±14.81      | 59.00±0.00                  | -        | <b>1*</b> | -  | -                 |

|                                      |     |                  |                     |   |               |   |   |
|--------------------------------------|-----|------------------|---------------------|---|---------------|---|---|
| <b>MTX therapy duration (months)</b> | 101 | 14.5 (5.0-31.5)  | 144.0 (144.0-144.0) | - | 1*            | - | - |
| <b>MTX Administration</b>            | 101 |                  |                     |   |               |   |   |
| Oral                                 | 47  | 47 (100.0)       | 0 (0.0)             | - | 0.238*        | - | - |
| Subcutaneous                         | 30  | 30 (100.0)       | 0 (0.0)             |   |               |   |   |
| Both                                 | 24  | 23 (95.8)        | 1 (4.2)             |   |               |   |   |
| <b>Type of MTX therapy</b>           | 101 |                  |                     |   |               |   |   |
| Monotherapy                          | 93  | 93 (100.0)       | 0 (0.0)             | - | <b>0.079*</b> | - | - |
| Combination Therapy                  | 8   | 7 (87.5)         | 1 (12.5)            |   |               |   |   |
| <b>Maximum MTX dose (mg/week)</b>    | 101 | 12.5 (10.0-15.0) | 20.0 (20.0-20.0)    | - | 1*            | - | - |
| <b>Therapeutic adherence</b>         |     |                  |                     |   |               |   |   |
| Adherent                             | 70  | 70 (100.0)       | 0 (0.0)             | - | 0.307*        | - | - |
| Intentional non-adherent             | 30  | 29 (96.7)        | 1 (3.3)             |   |               |   |   |
| Unintentional non-adherent           | 1   | 1 (100.0)        | 0 (0.0)             |   |               |   |   |

\*p-value for the Fisher's test. PS: psoriasis; PSA: psoriatic arthritis.
