# Supplementary material for: ABCC1, ABCG2 and FOXP3: Predictive Biomarkers of Toxicity from Methotrexate Treatment in Patients Diagnosed with Moderate-to-Severe Psoriasis
Source: MDPI journal article supplement (doi:10.3390/biomedicines11092567), 2023-09-19
Supplement: s1 [file s1]

**Table S24. Single nucleotide polymorphisms and hematological toxicity.**

| Gene  | SNP        | Genotype | N         | Hematological toxicity |                             | $\chi^2$ | p-value | OR | IC <sub>95%</sub> |
|-------|------------|----------|-----------|------------------------|-----------------------------|----------|---------|----|-------------------|
|       |            |          |           | NO<br>N (%)            | YES<br>(Grade 1-4)<br>N (%) |          |         |    |                   |
| ABCC1 | rs246240   | AA       | 74        | 72(97.3)               | 2(2.7)                      | -        | 1*      | -  | -                 |
|       |            | AG       | 24        | 23(95.8)               | 1(4.2)                      |          |         |    |                   |
|       |            | GG       | 3         | 3(100.0)               | 0(0.0)                      |          |         |    |                   |
|       |            | A        | 98        | 95(96.9)               | 3(3.1)                      |          |         |    |                   |
|       |            | G        | 27        | 26(96.3)               | 1(3.7)                      |          |         |    |                   |
|       | rs35592    | CC       | 3         | 3(100.0)               | 0(0.0)                      | -        | 0.6032* | -  | -                 |
|       |            | CT       | 40        | 38(95.0)               | 2(5.0)                      |          |         |    |                   |
|       |            | TT       | 58        | 57(98.3)               | 1(1.7)                      |          |         |    |                   |
|       |            | C        | 43        | 41(95.3)               | 2(4.7)                      |          |         |    |                   |
|       |            | T        | 98        | 95(96.9)               | 3(3.1)                      |          |         |    |                   |
|       | rs2238476  | GG       | 91        | 88(96.7)               | 3(3.3)                      | -        | 1*      | -  | -                 |
|       |            | AG       | 10        | 10(100.0)              | 0(0.0)                      |          |         |    |                   |
| A     |            | 10       | 10(100.0) | 0(0.0)                 |                             |          |         |    |                   |
| ABCG2 | rs13120400 | TT       | 53        | 51(96.2)               | 2(3.8)                      | -        | 1*      | -  | -                 |
|       |            | CT       | 42        | 41(97.6)               | 1(2.4)                      |          |         | -  | -                 |
|       |            | CC       | 6         | 6(100.0)               | 0(0.0)                      |          |         | -  | -                 |
|       |            | T        | 95        | 92(96.8)               | 3(3.2)                      |          |         | -  | -                 |
|       |            | C        | 48        | 47(97.9)               | 1(2.1)                      |          |         | -  | -                 |
| FOXP3 | rs3761548  | GG       | 32        | 31 (96.9)              | 1 (3.1)                     | -        | 0.189*  | -  | -                 |
|       |            | GT       | 29        | 27 (93.1)              | 2 (6.9)                     |          |         | -  | -                 |
|       |            | TT       | 40        | 40 (100.0)             | 0 (0.0)                     |          |         | -  | -                 |
|       |            | G        | 61        | 58 (95.1)              | 3 (4.9)                     |          |         | -  | -                 |
|       |            | T        | 69        | 67 (97.1)              | 2 (2.9)                     |          |         | -  | -                 |

\*p-value by Fisher's test.
