# Supplementary material for: ABCC1, ABCG2 and FOXP3: Predictive Biomarkers of Toxicity from Methotrexate Treatment in Patients Diagnosed with Moderate-to-Severe Psoriasis
Source: MDPI journal article supplement (doi:10.3390/biomedicines11092567), 2023-09-19
Supplement: s1 [file s1]

**Table S10. Clinical variables and hematologic toxicity**

| Characteristics             | N   | Hematologic toxicity |                             | $\chi^2$ | p-value | OR | IC <sub>95%</sub> |
|-----------------------------|-----|----------------------|-----------------------------|----------|---------|----|-------------------|
|                             |     | NO<br>N (%)          | YES<br>(Grade 1-4)<br>N (%) |          |         |    |                   |
| <b>Gender</b>               | 101 |                      |                             |          |         |    |                   |
| Female                      | 52  | 50(96.2)             | 2(3.8)                      | -        | 1*      | -  | -                 |
| Male                        | 49  | 48(98.0)             | 1(2.0)                      |          |         |    |                   |
| <b>Age diagnosis PS</b>     | 101 | 27.1 (18.0-44.3)     | 29.6 (24.2-34.3)            | -        | 0.777   | -  | -                 |
| <b>Family History of Ps</b> | 101 |                      |                             |          |         |    |                   |
| Yes                         | 52  | 49 (94.2)            | 3 (5.8)                     | -        | 0.243*  | -  | -                 |
| No                          | 49  | 49 (100.0)           | 0 (0.0)                     |          |         |    |                   |
| <b>Smoking</b>              | 101 |                      |                             |          |         |    |                   |
| Smoker                      | 31  | 31 (100.0)           | 0 (0.0)                     | -        | 0.305*  | -  | -                 |
| Non-smoking                 | 49  | 46 (93.9)            | 3 (6.1)                     |          |         |    |                   |
| Former Smoker               | 21  | 21 (100.0)           | 0 (0.0)                     |          |         |    |                   |
| <b>Alcoholic drinking</b>   | 101 |                      |                             |          |         |    |                   |
| Drinker                     | 38  | 38 (100.0)           | 0 (0.0)                     | -        | 0.325*  | -  | -                 |
| Non-drinker                 | 61  | 58 (95.1)            | 3 (4.9)                     |          |         |    |                   |
| Former Drinker              | 2   | 2 (100.0)            | 0 (0.0)                     |          |         |    |                   |
| <b>Type of Psoriasis</b>    | 101 |                      |                             |          |         |    |                   |
| Plaque                      | 74  | 72(97.3)             | 2(2.7)                      | -        | 0.417*  | -  | -                 |
| Pustular                    | 5   | 5(100.0)             | 0(0.0)                      |          |         |    |                   |
| Inverse                     | 1   | 1(100.0)             | 0(0.0)                      |          |         |    |                   |
| Guttate                     | 5   | 4(80.0)              | 1(20.0)                     |          |         |    |                   |
| Plaque and guttate          | 12  | 12(100.0)            | 0(0.0)                      |          |         |    |                   |
| Plaque and inverse          | 2   | 2(100.0)             | 0(0.0)                      |          |         |    |                   |
| Plaque and pustular         | 1   | 1(100.0)             | 0(0.0)                      |          |         |    |                   |
| Plaque, guttate and inverse | 1   | 1(100.0)             | 1(0.0)                      |          |         |    |                   |
| <b>Localization</b>         |     |                      |                             |          |         |    |                   |
| <b>Trunk and limbs</b>      | 101 |                      |                             |          |         |    |                   |
| Yes                         | 93  | 90(96.8)             | 3(3.2)                      | -        | 1*      | -  | -                 |
| No                          | 8   | 8(100.0)             | 0(0.0)                      |          |         |    |                   |
| <b>Scalp and face</b>       | 101 |                      |                             |          |         |    |                   |
| Yes                         | 77  | 74(96.1)             | 3(3.9)                      | -        | 1*      | -  | -                 |
| No                          | 24  | 24(100.0)            | 0(0.0)                      |          |         |    |                   |
| <b>Nails</b>                | 101 |                      |                             |          |         |    |                   |
| Yes                         | 58  | 56(96.6)             | 2(3.4)                      | -        | 1*      | -  | -                 |
| No                          | 43  | 42(97.7)             | 1(2.3)                      |          |         |    |                   |
| <b>Palmoplantar</b>         | 101 |                      |                             |          |         |    |                   |
| Yes                         | 19  | 19(100.0)            | 0(0.0)                      | -        | 1*      | -  | -                 |
| No                          | 82  | 79(96.3)             | 3(3.7)                      |          |         |    |                   |
| <b>Flexures</b>             | 101 |                      |                             |          |         |    |                   |
| Yes                         | 28  | 27 (96.4)            | 1 (3.6)                     | -        | 1*      | -  | -                 |
| No                          | 73  | 71 (97.3)            | 2 (2.7)                     |          |         |    |                   |
| <b>Development of PSA</b>   | 101 |                      |                             |          |         |    |                   |
| Yes                         | 31  | 29(93.5)             | 2(6.5)                      | -        | 1*      | -  | -                 |
| No                          | 70  | 69(98.6)             | 1(1.4)                      |          |         |    |                   |
| <b>Comorbidities</b>        | 101 |                      |                             |          |         |    |                   |

|                                      |     |                 |                  |   |       |   |   |
|--------------------------------------|-----|-----------------|------------------|---|-------|---|---|
|                                      |     |                 |                  |   |       |   |   |
| Yes                                  | 57  | 55(96.4)        | 2(3.5)           | - | 1*    | - | - |
| No                                   | 44  | 43(97.7)        | 1(2.3)           |   |       |   |   |
| <b>Age of onset of MTX</b>           | 101 | 45.77±14.94     | 40.33±8.50       | - | 0.385 | - | - |
| <b>MTX therapy duration (months)</b> | 101 | 14.5 (5.0-35.3) | 15.0 (8.5-19.5)  | - | 0.253 | - | - |
| <b>MTX Administration</b>            | 101 |                 |                  |   |       |   |   |
| Oral                                 | 47  | 46 (97.9)       | 1 (2.1)          | - | 1*    | - | - |
| Subcutaneous                         | 30  | 29 (96.7)       | 1 (3.3)          |   |       |   |   |
| Both                                 | 24  | 23 (95.8)       | 1 (4.2)          |   |       |   |   |
| <b>Type of MTX therapy</b>           | 101 |                 |                  |   |       |   |   |
| Monotherapy                          | 93  | 90 (96.8)       | 3 (3.2)          | - | 1*    | - | - |
| Combination Therapy                  | 8   | 8 (100.0)       | 0 (0.0)          |   |       |   |   |
| <b>Maximum MTX dose (mg/week)</b>    | 101 | 12.5 (10.-15.0) | 15.0 (10.0-15.0) | - | 0.756 | - | - |
| <b>Therapeutic adherence</b>         |     |                 |                  |   |       |   |   |
| Adherent                             | 70  | 68 (97.1)       | 2 (2.9)          | - | 1*    | - | - |
| Intentional non-adherent             | 30  | 29 (96.7)       | 1 (3.3)          |   |       |   |   |
| Unintentional non-adherent           | 1   | 1 (100.0)       | 0 (0.0)          |   |       |   |   |

\*p-value for the Fisher's test. PS: psoriasis; PSA: psoriatic arthritis
