# Supplementary material for: ABCC1, ABCG2 and FOXP3: Predictive Biomarkers of Toxicity from Methotrexate Treatment in Patients Diagnosed with Moderate-to-Severe Psoriasis
Source: MDPI journal article supplement (doi:10.3390/biomedicines11092567), 2023-09-19
Supplement: s1 [file s1]

Table S7. Clinical variables and neurotoxicity

| Characteristics             | N   | Neurotoxicity    |                         | $\chi^2$ | p-value | OR   | IC <sub>95%</sub> |
|-----------------------------|-----|------------------|-------------------------|----------|---------|------|-------------------|
|                             |     | NO<br>N (%)      | SI (Grado 1-4)<br>N (%) |          |         |      |                   |
| <b>Gender</b>               | 101 |                  |                         |          |         |      |                   |
| Female                      | 52  | 46(88.5)         | 6(11.5)                 | -        | 0.489*  | -    | -                 |
| Male                        | 49  | 46(93.9)         | 3(6.1)                  |          |         |      |                   |
| <b>Age diagnosis PS</b>     | 101 | 27.1 (18.3-43.6) | 35.2 (20.9-35.3)        | -        | 0.557   | -    | -                 |
| <b>Family History of Ps</b> | 101 |                  |                         |          |         |      |                   |
| Yes                         | 52  | 49 (94.2)        | 3 (5.8)                 | -        | 0.309*  | -    | -                 |
| No                          | 49  | 43 (87.8)        | 6 (12.2)                |          |         |      |                   |
| <b>Smoking</b>              | 101 |                  |                         |          |         |      |                   |
| Smoker                      | 31  | 28 (90.3)        | 3 (9.7)                 | -        | 1*      | -    | -                 |
| Non-smoking                 | 49  | 45 (91.8)        | 4 (8.2)                 |          |         |      |                   |
| Former Smoker               | 21  | 19 (90.5)        | 2 (9.5)                 |          |         |      |                   |
| <b>Alcoholic drinking</b>   | 101 |                  |                         |          |         |      |                   |
| Drinker                     | 38  | 34 (89.5)        | 4 (10.5)                | -        | 0.776*  | -    | -                 |
| Non-drinker                 | 61  | 56 (91.8)        | 5 (8.2)                 |          |         |      |                   |
| Former Drinker              | 2   | 2 (100.0)        | 0 (0.0)                 |          |         |      |                   |
| <b>Type of Psoriasis</b>    | 101 |                  |                         |          |         |      |                   |
| Plaque                      | 74  | 66(89.2)         | 8(10.8)                 | -        | 0.700*  | -    | -                 |
| Pustular                    | 5   | 5(100.0)         | 0(0.0)                  |          |         |      |                   |
| Inverse                     | 1   | 1(100.0)         | 0(0.0)                  |          |         |      |                   |
| Guttate                     | 5   | 4(80.0)          | 1(20.0)                 |          |         |      |                   |
| Plaque and guttate          | 12  | 12(100.0)        | 0(0.0)                  |          |         |      |                   |
| Plaque and inverse          | 2   | 2(100.0)         | 0(0.0)                  |          |         |      |                   |
| Plaque and pustular         | 1   | 1(100.0)         | 0(0.0)                  |          |         |      |                   |
| Plaque, guttate and inverse | 1   | 1(100.0)         | 0(0.0)                  |          |         |      |                   |
| <b>Localization</b>         |     |                  |                         |          |         |      |                   |
| <b>Trunk and limbs</b>      | 101 |                  |                         |          |         |      |                   |
| Yes                         | 93  | 86(92.5)         | 7(7.5)                  | -        | 0.149*  | -    | -                 |
| No                          | 8   | 6(75.0)          | 2(25.0)                 |          |         |      |                   |
| <b>Scalp and face</b>       | 101 |                  |                         |          |         |      |                   |
| Yes                         | 77  | 70(90.9)         | 7(9.1)                  | -        | 1*      | -    | -                 |
| No                          | 24  | 22(91.7)         | 2(8.3)                  |          |         |      |                   |
| <b>Nails</b>                | 101 |                  |                         |          |         |      |                   |
| Yes                         | 58  | 51(87.9)         | 7(12.1)                 | -        | 0.295*  | -    | -                 |
| No                          | 43  | 41(95.3)         | 2(4.7)                  |          |         |      |                   |
| <b>Palmoplantar</b>         | 101 |                  |                         |          |         |      |                   |
| Yes                         | 19  | 17(89.5)         | 2(10.5)                 | -        | 0.676*  | -    | -                 |
| No                          | 82  | 75(91.5)         | 7(8.5)                  |          |         |      |                   |
| <b>Flexures</b>             | 101 |                  |                         |          |         |      |                   |
| Yes                         | 28  | 22 (78.6)        | 6 (21.4)                | 7.479    | 0.006   | 6.36 | 1.55-32.17        |
| No                          | 73  | 70 (95.9)        | 3 (4.1)                 |          |         | 1    | -                 |
| <b>Development of PSA</b>   | 101 |                  |                         |          |         |      |                   |
| Yes                         | 31  | 28(90.3)         | 3(9.7)                  | -        | 1*      | -    | -                 |
| No                          | 70  | 64(91.4)         | 6(8.6)                  |          |         |      |                   |
| <b>Comorbidities</b>        | 101 |                  |                         |          |         |      |                   |

|                                      |     |                  |                  |   |               |             |                    |
|--------------------------------------|-----|------------------|------------------|---|---------------|-------------|--------------------|
|                                      |     |                  |                  |   |               |             |                    |
| Yes                                  | 57  | 50(87.7)         | 7(12.3)          | - | 0.292*        | -           | -                  |
| No                                   | 44  | 42(95.5)         | 2(4.5)           |   |               |             |                    |
| <b>Age of onset of MTX</b>           | 101 | 45.92±14.88      | 42.33±14.32      | - | 0.491         | -           | -                  |
| <b>MTX therapy duration (months)</b> | 101 | 14.5 (5.0-31.0)  | 17.0 (7.0-36.0)  | - | 0.569         | -           | -                  |
| <b>MTX Administration</b>            | 101 |                  |                  |   |               |             |                    |
| Oral                                 | 47  | 46 (97.9)        | 1 (2.1)          | - | <b>0.047*</b> | <b>1</b>    | -                  |
| Subcutaneous                         | 30  | 26 (86.7)        | 4 (13.3)         |   |               | <b>7.07</b> | <b>0.98-142.41</b> |
| Both                                 | 24  | 20 (83.3)        | 4 (16.7)         |   |               | <b>9.19</b> | <b>1.26-186.15</b> |
| <b>Type of MTX therapy</b>           | 101 |                  |                  |   |               |             |                    |
| Monotherapy                          | 93  | 84 (90.3)        | 9 (9.7)          | - | 1*            | -           | -                  |
| Combination Therapy                  | 8   | 8 (100.0)        | 0 (0.0)          |   |               |             |                    |
| <b>Maximum MTX dose (mg/week)</b>    | 101 | 12.5 (10.0-15.0) | 15.0 (10.0-15.0) | - | 0.679*        | -           | -                  |
| <b>Therapeutic adherence</b>         | 101 |                  |                  |   |               |             |                    |
| Adherent                             | 70  | 64 (91.4)        | 6 (8.6)          | - | 1*            | -           | -                  |
| Intentional non-adherent             | 30  | 27 (90.0)        | 3 (10.0)         |   |               |             |                    |
| Unintentional non-adherent           | 1   | 1 (100.0)        | 0 (0.0)          |   |               |             |                    |

\*p-value for the Fisher's test. PS: psoriasis; PSA: psoriatic arthritis
