# Supplementary material for: ABCC1, ABCG2 and FOXP3: Predictive Biomarkers of Toxicity from Methotrexate Treatment in Patients Diagnosed with Moderate-to-Severe Psoriasis
Source: MDPI journal article supplement (doi:10.3390/biomedicines11092567), 2023-09-19
Supplement: s1 [file s1]

**Table S16. Single nucleotide polymorphisms and more than one adverse event.**

| Gene                        | SNP        | Genotype | N        | More than<br>1 adverse event |                             | χ <sup>2</sup> | p-value | OR   | IC <sub>95%</sub> |
|-----------------------------|------------|----------|----------|------------------------------|-----------------------------|----------------|---------|------|-------------------|
|                             |            |          |          | NO<br>N (%)                  | YES<br>(Grado 1-4)<br>N (%) |                |         |      |                   |
| ABCC1                       | rs246240   | AA       | 74       | 49(66.2)                     | 25(33.8)                    | -              | 0.831*  | -    | -                 |
|                             |            | AG       | 24       | 14(58.3)                     | 10(41.7)                    |                |         |      |                   |
|                             |            | GG       | 3        | 2(66.7)                      | 1(33.3)                     |                |         |      |                   |
|                             |            | A        | 98       | 63(64.3)                     | 35(35.7)                    | -              | 1*      | -    | -                 |
|                             |            | G        | 27       | 16(59.3)                     | 11(40.7)                    | 0.417          | 0.518   | -    | -                 |
|                             | rs35592    | CC       | 3        | 2(66.7)                      | 1(33.3)                     | -              | 0.924*  | -    | -                 |
|                             |            | CT       | 40       | 25(62.5)                     | 15(37.5)                    |                |         |      |                   |
|                             |            | TT       | 58       | 38(65.5)                     | 20(34.5)                    |                |         |      |                   |
|                             |            | C        | 43       | 27(62.8)                     | 16(37.2)                    | 0.080          | 0.777   | -    | -                 |
|                             |            | T        | 98       | 63(64.3)                     | 35(35.7)                    |                | 1*      | -    | -                 |
|                             | rs2238476  | GG       | 91       | 61(67.0)                     | 30(33.0)                    | -              | 0.160*  | -    | -                 |
|                             |            | AG       | 10       | 4(40.0)                      | 6(60.0)                     |                |         |      |                   |
| A                           |            | 10       | 4 (40.0) | 6(60.0)                      | -                           |                |         |      |                   |
| ABCG2                       | rs13120400 | TT       | 53       | 32(60.4)                     | 21(39.6)                    | -              | 0.529*  | -    | -                 |
|                             |            | CT       | 42       | 28(66.7)                     | 14(33.3)                    |                |         |      |                   |
|                             |            | CC       | 6        | 5(83.3)                      | 1(16.7)                     |                |         |      |                   |
|                             |            | T        | 95       | 60(63.2)                     | 35(36.8)                    | -              | 0.417*  | -    | -                 |
|                             |            | C        | 48       | 33(68.8)                     | 15(31.2)                    | -              | 0.412*  | -    | -                 |
| FOXP3                       | rs3761548  | GG       | 32       | 23 (71.9)                    | 9 (28.1)                    | 6.767          | 0.034   | 1.03 | 0.36-2.91         |
|                             |            | GT       | 29       | 13 (44.8)                    | 16 (55.2)                   |                |         | 3.24 | 1.20-9.15         |
|                             |            | TT       | 40       | 29 (72.5)                    | 11 (27.5)                   |                |         | 1    | -                 |
|                             |            | G        | 61       | 36 (59.0)                    | 25 (41.0)                   | 1.915          | 0.166   | -    | -                 |
|                             |            | T        | 69       | 42 (60.9)                    | 27 (39.1)                   | 1.154          | 0.283   | -    | -                 |
| * p-value for test Fisher's |            |          |          |                              |                             |                |         |      |                   |
