# Supplementary material for: ABCC1, ABCG2 and FOXP3: Predictive Biomarkers of Toxicity from Methotrexate Treatment in Patients Diagnosed with Moderate-to-Severe Psoriasis
Source: MDPI journal article supplement (doi:10.3390/biomedicines11092567), 2023-09-19
Supplement: s1 [file s1]

**Tabla S20. Single nucleotide polymorphisms and asthenia**

| Gen   | SNP        | Genotype | N  | Asthenia    |                             | $\chi^2$ | p-value | OR   | IC <sub>95%</sub> |
|-------|------------|----------|----|-------------|-----------------------------|----------|---------|------|-------------------|
|       |            |          |    | NO<br>N (%) | YES<br>(Grade 1-4)<br>N (%) |          |         |      |                   |
| ABCC1 | rs246240   | AA       | 74 | 53(71.6)    | 21(28.4)                    | -        | 1*      | -    | -                 |
|       |            | AG       | 24 | 18(75.0)    | 6(25.0)                     |          |         |      |                   |
|       |            | GG       | 3  | 2(66.7)     | 1(33.3)                     |          |         |      |                   |
|       |            | A        | 98 | 71(72.4)    | 27(27.6)                    | -        | 1*      | -    | -                 |
|       |            | G        | 27 | 20(74.1)    | 7(25.9)                     | 0.059    | 0.808   | -    | -                 |
|       | rs35592    | CC       | 3  | 2(66.7)     | 1(33.3)                     | -        | 1*      | -    | -                 |
|       |            | CT       | 40 | 29(72.5)    | 11(27.5)                    |          |         |      |                   |
|       |            | TT       | 58 | 42(72.4)    | 16(27.6)                    |          |         |      |                   |
|       |            | C        | 43 | 31(72.1)    | 12(27.9)                    | 0.001    | 0.972   | -    | -                 |
|       |            | T        | 98 | 71(72.4)    | 27(27.6)                    | -        | 1*      | -    | -                 |
|       | rs2238476  | GG       | 91 | 69(75.8)    | 22(24.2)                    | -        | 0.025*  | 1    | -                 |
|       |            | AG       | 10 | 4(40.0)     | 6(60.0)                     |          |         | 4.70 | 1.23-19.87        |
|       |            | A        | 10 | 4(40.0)     | 6(60.0)                     | -        | 0.026*  | 4.70 | 1.23-19.87        |
| ABCG2 | rs13120400 | TT       | 53 | 39(73.6)    | 14(26.4)                    | -        | 0.769*  | -    | -                 |
|       |            | CT       | 42 | 29(69.0)    | 13(31.0)                    |          |         |      |                   |
|       |            | CC       | 6  | 5(83.3)     | 1(16.7)                     |          |         |      |                   |
|       |            | T        | 95 | 68(71.6)    | 27(28.4)                    | -        | 1*      | -    | -                 |
|       |            | C        | 48 | 34(70.8)    | 14(29.2)                    | 0.095    | 0.758   | -    | -                 |
| FOXP3 | rs3761548  | GG       | 32 | 25 (78.1)   | 7 (21.9)                    | 5.971    | 0.051   | 1.12 | 0.35-3.53         |
|       |            | GT       | 29 | 16 (55.2)   | 13 (44.8)                   |          |         | 3.25 | 1.14-9.79         |
|       |            | TT       | 40 | 32 (80.0)   | 8 (20.0)                    |          |         | 1    | -                 |
|       |            | G        | 61 | 41 (67.2)   | 20 (32.8)                   | 1.971    | 0.160   | -    | -                 |
|       |            | T        | 69 | 48 (69.6)   | 21 (30.4)                   | 0.799    | 0.371   | -    | -                 |

\*p-value por el test de Fisher's
