# Supplementary material for: ABCC1, ABCG2 and FOXP3: Predictive Biomarkers of Toxicity from Methotrexate Treatment in Patients Diagnosed with Moderate-to-Severe Psoriasis
Source: MDPI journal article supplement (doi:10.3390/biomedicines11092567), 2023-09-19
Supplement: s1 [file s1]

Table S17. Single nucleotide polymorphisms and more than two adverse events.

| Gene         | SNP        | Genotype | N  | More than 2 adverse events |                             | $\chi^2$ | p-value | OR   | IC <sub>95%</sub> |
|--------------|------------|----------|----|----------------------------|-----------------------------|----------|---------|------|-------------------|
|              |            |          |    | NO<br>N (%)                | YES<br>(Grado 1-4)<br>N (%) |          |         |      |                   |
| <i>ABCC1</i> | rs246240   | AA       | 74 | 61(82.4)                   | 13(17.6)                    | -        | 0.599*  | -    | -                 |
|              |            | AG       | 24 | 22(91.7)                   | 2(8.3)                      |          |         |      |                   |
|              |            | GG       | 3  | 3(100.0)                   | 0(0.0)                      |          |         |      |                   |
|              |            | A        | 98 | 83(84.7)                   | 15(15.3)                    | -        | 1*      | -    | -                 |
|              |            | G        | 27 | 25(92.6)                   | 2(7.4)                      | -        | 0.343*  | -    | -                 |
|              | rs35592    | CC       | 3  | 3(100.0)                   | 0(0.0)                      | -        | 0.405*  | -    | -                 |
|              |            | CT       | 40 | 36(90.0)                   | 4(10.0)                     |          |         |      |                   |
|              |            | TT       | 58 | 47(81.0)                   | 11(19.0)                    |          |         |      |                   |
|              |            | C        | 43 | 39(90.7)                   | 4(9.3)                      | 1.8233   | 0.176   | -    | -                 |
|              |            | T        | 98 | 83(84.7)                   | 15(15.3)                    | -        | 1*      | -    | -                 |
|              | rs2238476  | GG       | 91 | 80(87.9)                   | 11(12.1)                    | -        | 0.039*  | 1    | -                 |
|              |            | AG       | 10 | 6(60.0)                    | 4(40.0)                     |          |         | 4.85 | 1.09-19.89        |
|              |            | A        | 10 | 6(60.0)                    | 4(40.0)                     | -        | 0.039*  | 4.85 | 1.09-19.89        |
| <i>ABCG2</i> | rs13120400 | TT       | 53 | 46(86.8)                   | 7(13.2)                     | -        | 0.906*  | -    | -                 |
|              |            | CT       | 42 | 35(83.3)                   | 7(16.7)                     |          |         |      |                   |
|              |            | CC       | 6  | 5(83.3)                    | 1(16.7)                     |          |         |      |                   |
|              |            | T        | 95 | 81(85.3)                   | 14(14.7)                    | 0.017    | 0.897   | -    | -                 |
|              |            | C        | 48 | 40(83.3)                   | 8(16.7)                     | 0.238    | 0.625   | -    | -                 |
| <i>FOXP3</i> | rs3761548  | GG       | 32 | 29 (90.6)                  | 3 (9.4)                     | -        | 0.021*  | 1.28 | 0.22-7.34         |
|              |            | GT       | 29 | 20 (69.0)                  | 9 (31.0)                    |          |         | 5.55 | 1.47-27.20        |
|              |            | TT       | 40 | 37 (92.5)                  | 3 (7.5)                     |          |         | 1    | -                 |
|              |            | G        | 61 | 49 (80.3)                  | 12 (19.7)                   | 2.830    | 0.092   | -    | -                 |
|              |            | T        | 69 | 57 (82.6)                  | 12 (17.4)                   | -        | 0.377*  | -    | -                 |

\* p-value by Fisher's test.
