# Supplementary material for: ABCC1, ABCG2 and FOXP3: Predictive Biomarkers of Toxicity from Methotrexate Treatment in Patients Diagnosed with Moderate-to-Severe Psoriasis
Source: MDPI journal article supplement (doi:10.3390/biomedicines11092567), 2023-09-19
Supplement: s1 [file s1]

Table S9. Clinical variables and infections

| Characteristics             | N   | Infections       |                             | $\chi^2$ | p-value | OR   | IC <sub>95%</sub> |
|-----------------------------|-----|------------------|-----------------------------|----------|---------|------|-------------------|
|                             |     | NO<br>N (%)      | YES<br>(Grade 1-4)<br>N (%) |          |         |      |                   |
| <b>Gender</b>               | 101 |                  |                             |          |         |      |                   |
| Female                      | 52  | 47(90.4)         | 5(9.6)                      | -        | *0.206  | -    | -                 |
| Male                        | 49  | 48(98.0)         | 1(2.0)                      |          |         |      |                   |
| <b>Age diagnosis PS</b>     | 101 | 27.3 (18.9-43.4) | 27.4 (11.3-46.5)            | -        | 0.864   | -    | -                 |
| <b>Family History of Ps</b> | 101 |                  |                             |          |         |      |                   |
| Yes                         | 52  | 47 (90.4)        | 5 (9.6)                     | -        | 0.206*  | -    | -                 |
| No                          | 49  | 48 (98.0)        | 1 (2.0)                     |          |         |      |                   |
| <b>Smoking</b>              | 101 |                  |                             |          |         |      |                   |
| Smoker                      | 31  | 30 (96.8)        | 1 (3.2)                     | -        | 0.287*  | -    | -                 |
| Non-smoking                 | 49  | 47 (95.9)        | 2 (4.1)                     |          |         |      |                   |
| Former Smoker               | 21  | 18 (85.7)        | 3 (14.3)                    |          |         |      |                   |
| <b>Alcoholic drinking</b>   | 101 |                  |                             |          |         |      |                   |
| Drinker                     | 38  | 37 (97.4)        | 1 (2.6)                     | -        | 0.471*  | -    | -                 |
| Non-drinker                 | 61  | 56 (91.8)        | 5 (8.2)                     |          |         |      |                   |
| Former Drinker              | 2   | 2 (100.0)        | 0 (0.0)                     |          |         |      |                   |
| <b>Type of Psoriasis</b>    | 101 |                  |                             |          |         |      |                   |
| Plaque                      | 74  | 69(93.2)         | 5(6.8)                      | -        | 1*      | -    | -                 |
| Pustular                    | 5   | 5(100.0)         | 0(0.0)                      |          |         |      |                   |
| Inverse                     | 1   | 1(100.0)         | 0(0.0)                      |          |         |      |                   |
| Guttate                     | 5   | 5(100.0)         | 0(0.0)                      |          |         |      |                   |
| Plaque and guttate          | 12  | 11(91.7)         | 1(8.3)                      |          |         |      |                   |
| Plaque and inverse          | 2   | 2(100.0)         | 0(0.0)                      |          |         |      |                   |
| Plaque and pustular         | 1   | 1(100.0)         | 0(0.0)                      |          |         |      |                   |
| Plaque, guttate and inverse | 1   | 1(100.0)         | 0(0.0)                      |          |         |      |                   |
| <b>Localization</b>         |     |                  |                             |          |         |      |                   |
| <b>Trunk and limbs</b>      | 101 |                  |                             |          |         |      |                   |
| Yes                         | 93  | 88(94.6)         | 5(5.4)                      | -        | 0.399*  | -    | -                 |
| No                          | 8   | 7(87.5)          | 1(12.5)                     |          |         |      |                   |
| <b>Scalp and face</b>       | 101 |                  |                             |          |         |      |                   |
| Yes                         | 77  | 75(97.4)         | 2(2.6)                      | -        | 0.027*  | 1    | -                 |
| No                          | 24  | 20(83.3)         | 4(16.7)                     |          |         | 7.50 | 1.36-56.97        |
| <b>Nails</b>                | 101 |                  |                             |          |         |      |                   |
| Yes                         | 58  | 54(93.1)         | 4(6.9)                      | -        | 1*      | -    | -                 |
| No                          | 43  | 41(95.3)         | 2(4.7)                      |          |         |      |                   |
| <b>Palmoplantar</b>         | 101 |                  |                             |          |         |      |                   |
| Yes                         | 19  | 19(100.0)        | 0(0.0)                      | -        | 0.591*  | -    | -                 |
| No                          | 82  | 76(92.7)         | 6(7.3)                      |          |         |      |                   |
| <b>Flexures</b>             | 101 |                  |                             |          |         |      |                   |
| Yes                         | 28  | 26 (92.9)        | 2 (7.1)                     | -        | 0.668*  | -    | -                 |
| No                          | 73  | 69 (94.5)        | 4 (5.5)                     |          |         |      |                   |
| <b>Development of PSA</b>   | 101 |                  |                             |          |         |      |                   |
| Yes                         | 31  | 27(87.1)         | 4(12.9)                     | -        | 0.069*  | -    | -                 |
| No                          | 70  | 68(97.1)         | 2(2.9)                      |          |         |      |                   |

|                                      |     |                  |                  |       |        |   |   |
|--------------------------------------|-----|------------------|------------------|-------|--------|---|---|
| <b>Comorbidities</b>                 | 101 |                  |                  |       |        |   |   |
| Yes                                  | 57  | 53(93.0)         | 4(7.0)           | -     | 0.694* | - | - |
| No                                   | 44  | 42(95.5)         | 2(4.5)           |       |        |   |   |
| <b>Age of onset of MTX</b>           | 101 | 45.39±15.07      | 49.00±9.61       | -     | 0.422  | - | - |
| <b>MTX therapy duration (months)</b> | 101 | 15.0 (5.0-32.0)  | 9.0 (6.5-46.8)   | -     | 0.870  | - | - |
| <b>MTX Administration</b>            | 101 |                  |                  |       |        |   |   |
| Oral                                 | 47  | 44 (93.6)        | 3 (6.4)          | -     | 0.866* | - | - |
| Subcutaneous                         | 30  | 29 (96.7)        | 1 (3.3)          |       |        |   |   |
| Both                                 | 24  | 22 (91.7)        | 2 (8.3)          |       |        |   |   |
| <b>Type of MTX therapy</b>           | 101 |                  |                  |       |        |   |   |
| Monotherapy                          | 93  | 88 (94.6)        | 5 (5.4)          | 0.669 | 0.413  | - | - |
| Combination Therapy                  | 8   | 7 (87.5)         | 1 (12.5)         |       |        |   |   |
| <b>Maximum MTX dose (mg/week)</b>    | 101 | 15.0 (10.0-15.0) | 10.0 (10.0-11.9) | -     | 0.106  | - | - |
| <b>Therapeutic adherence</b>         | 101 |                  |                  |       |        |   |   |
| Adherent                             | 70  | 66 (94.3)        | 4 (5.7)          | -     | 1*     | - | - |
| Intentional non-adherent             | 30  | 28 (93.3)        | 2 (6.7)          |       |        |   |   |
| Unintentional non-adherent           | 1   | 1 (100.0)        | 0 (0.0)          |       |        |   |   |

\*p-value for the Fisher's test. PS: psoriasis; PSA: psoriatic arthritis
