# Supplementary material for: ABCC1, ABCG2 and FOXP3: Predictive Biomarkers of Toxicity from Methotrexate Treatment in Patients Diagnosed with Moderate-to-Severe Psoriasis
Source: MDPI journal article supplement (doi:10.3390/biomedicines11092567), 2023-09-19
Supplement: s1 [file s1]

Table S4. Clinical variables and hepatotoxicity

| Characteristics             | N   | Hepatotoxicity      |                             | $\chi^2$ | p-value | OR | IC <sub>95%</sub> |
|-----------------------------|-----|---------------------|-----------------------------|----------|---------|----|-------------------|
|                             |     | NO<br>N (%)         | YES<br>(Grado 1-4)<br>N (%) |          |         |    |                   |
| <b>Gender</b>               | 101 |                     |                             |          |         |    |                   |
| Female                      | 52  | 35(67.3)            | 17(32.7)                    | 0.717    | 0.397   | -  | -                 |
| Male                        | 49  | 29(59.2)            | 20(40.8)                    |          |         |    |                   |
| <b>Age diagnosis PS</b>     | 101 | 29.2<br>(17.6-46.4) | 26.7<br>(19.1-39.1)         | -        | 0.613   | -  | -                 |
| <b>Family History of Ps</b> | 101 |                     |                             |          |         |    |                   |
| Yes                         | 52  | 34 (65.4)           | 18 (34.6)                   | 0.188    | 0.665   | -  | -                 |
| No                          | 49  | 30 (61.2)           | 19 (38.8)                   |          |         |    |                   |
| <b>Smoking</b>              | 101 |                     |                             |          |         |    |                   |
| Smoker                      | 31  | 24 (77.4)           | 7 (22.6)                    | 4.098    | 0.129   | -  | -                 |
| Non-smoking                 | 49  | 27 (55.1)           | 22 (44.9)                   |          |         |    |                   |
| Former Smoker               | 21  | 13 (61.9)           | 8 (38.1)                    |          |         |    |                   |
| <b>Alcoholic drinking</b>   | 101 |                     |                             |          |         |    |                   |
| Drinker                     | 38  | 22 (57.9)           | 16 (42.1)                   | -        | 0.474*  | -  | -                 |
| Non-drinker                 | 61  | 40 (65.6)           | 21 (34.4)                   |          |         |    |                   |
| Former Drinker              | 2   | 2 (100.0)           | 0 (0.0)                     |          |         |    |                   |
| <b>Type of Psoriasis</b>    | 101 |                     |                             |          |         |    |                   |
| Plaque                      | 74  | 47(63.5)            | 27(36.5)                    | -        | 0.102*  | -  | -                 |
| Pustular                    | 5   | 4(80.0)             | 1(20.0)                     |          |         |    |                   |
| Inverse                     | 1   | 0(0.0)              | 1(100.0)                    |          |         |    |                   |
| Guttate                     | 5   | 5(100.0)            | 0(0.0)                      |          |         |    |                   |
| Plaque and guttate          | 12  | 7(58.3)             | 5(41.7)                     |          |         |    |                   |
| Plaque and inverse          | 2   | 0(0.0)              | 2(100.0)                    |          |         |    |                   |
| Plaque and pustular         | 1   | 1(100.0)            | 0(0.0)                      |          |         |    |                   |
| Plaque, guttate and inverse | 1   | 0(0.0)              | 1(100.0)                    |          |         |    |                   |
| <b>Localization</b>         |     |                     |                             |          |         |    |                   |
| <b>Trunk and limbs</b>      | 101 |                     |                             |          |         |    |                   |
| Yes                         | 93  | 58(62.4)            | 35(37.6)                    | 0.507    | 0.477   | -  | -                 |
| No                          | 8   | 6(75.0)             | 2(25.0)                     |          |         |    |                   |
| <b>Scalp and face</b>       | 101 |                     |                             |          |         |    |                   |
| Yes                         | 77  | 47(61.0)            | 30(39.0)                    | 0.756    | 0.385   | -  | -                 |
| No                          | 24  | 17(70.8)            | 7(29.2)                     |          |         |    |                   |
| <b>Nails</b>                | 101 |                     |                             |          |         |    |                   |
| Yes                         | 58  | 34(58.6)            | 24(41.4)                    | 1.322    | 0.250   | -  | -                 |
| No                          | 43  | 30(69.8)            | 13(30.2)                    |          |         |    |                   |
| <b>Palmoplantar</b>         | 101 |                     |                             |          |         |    |                   |
| Yes                         | 19  | 12(63.2)            | 7(36.8)                     | 0.004    | 0.983   | -  | -                 |
| No                          | 82  | 52(63.4)            | 30(36.6)                    |          |         |    |                   |
| <b>Flexures</b>             | 101 |                     |                             |          |         |    |                   |
| Yes                         | 28  | 16 (57.1)           | 12 (42.9)                   | 0.646    | 0.421   | -  | -                 |
| No                          | 73  | 48 (65.8)           | 25 (34.2)                   |          |         |    |                   |
| <b>Development of PSA</b>   | 101 |                     |                             |          |         |    |                   |
| Yes                         | 31  | 18(58.1)            | 13(41.9)                    | 0.543    | 0.462   | -  | -                 |
| No                          | 70  | 46(65.7)            | 24(34.3)                    |          |         |    |                   |

|                                      |     |                     |                     |       |        |   |   |
|--------------------------------------|-----|---------------------|---------------------|-------|--------|---|---|
| <b>Comorbidities</b>                 | 101 |                     |                     |       |        |   |   |
| Yes                                  | 57  | 35(61.4)            | 22(38.6)            | 0.217 | 0.641  | - | - |
| No                                   | 44  | 29(65.9)            | 15(34.1)            |       |        |   |   |
| <b>Age of onset of MTX</b>           | 101 | 46.05±14.44         | 44.84±15.56         | -     | 0.701  | - | - |
| <b>MTX therapy duration (months)</b> | 101 | 12.0<br>(5.0-24.3)  | 18.0<br>(5.0-41.0)  | -     | 0.219  | - | - |
| <b>MTX Administration</b>            | 101 |                     |                     |       |        |   |   |
| Oral                                 | 47  | 29 (61.7)           | 18 (38.3)           | 0.779 | 0.677  | - | - |
| Subcutaneous                         | 30  | 18 (60.0)           | 12 (40.0)           |       |        |   |   |
| Both                                 | 24  | 17 (70.8)           | 7 (29.2)            |       |        |   |   |
| <b>Type of MTX therapy</b>           | 101 |                     |                     |       |        |   |   |
| Monotherapy                          | 93  | 59 (63.4)           | 34 (36.6)           | 0.003 | 0.958  | - | - |
| Combination Therapy                  | 8   | 5 (62.5)            | 3 (37.5)            |       |        |   |   |
| <b>Maximum MTX dose (mg/week)</b>    | 101 | 13.8<br>(10.0-15.0) | 12.5<br>(10.0-15.0) | -     | 0.977  | - | - |
| <b>Therapeutic adherence</b>         |     |                     |                     |       |        |   |   |
| Adherent                             | 70  | 46 (65.7)           | 24 (34.3)           | -     | 0.403* | - | - |
| Intentional non-adherent             | 30  | 18 (60.0)           | 12 (40.0)           |       |        |   |   |
| Unintentional non-adherent           | 1   | 0 (0.0)             | 1 (100.0)           |       |        |   |   |

\*p-value for the Fisher's test. PS: psoriasis; PSA: psoriatic arthritis
