# Supplementary material for: ABCC1, ABCG2 and FOXP3: Predictive Biomarkers of Toxicity from Methotrexate Treatment in Patients Diagnosed with Moderate-to-Severe Psoriasis
Source: MDPI journal article supplement (doi:10.3390/biomedicines11092567), 2023-09-19
Supplement: s1 [file s1]

Table S1. Clinical variables and overall toxicity

| Characteristics                      | N   | Overall toxicity     |                             | $\chi^2$ | p-value      | OR          | IC <sub>95%</sub> |
|--------------------------------------|-----|----------------------|-----------------------------|----------|--------------|-------------|-------------------|
|                                      |     | No<br>N (%)          | Yes<br>(Grade 1-4)<br>N (%) |          |              |             |                   |
| <b>Gender</b>                        |     |                      |                             |          |              |             |                   |
| Female                               | 52  | 15 (28.8)            | 37 (71.2)                   | 0.399    | 0.528        | -           | -                 |
| Male                                 | 49  | 17 (34.7)            | 32 (65.3)                   |          |              |             |                   |
| <b>Age diagnosis PS</b>              | 101 | 26.5<br>(18.2-49.3)  | 28.5<br>(18.8-41.4)         | 0.702    | 0.486        | -           | -                 |
| <b>Family History of Ps</b>          |     |                      |                             |          |              |             |                   |
| Yes                                  | 52  | 17 (32.7)            | 35 (67.3)                   | 0.050    | 0.822        | -           | -                 |
| No                                   | 49  | 15 (30.6)            | 34 (69.4)                   |          |              |             |                   |
| <b>Smoking</b>                       |     |                      |                             |          |              |             |                   |
| Smoker                               | 31  | 13 (41.9)            | 18 (58.1)                   | 2.326    | 0.313        | -           | -                 |
| Non-smoking                          | 49  | 14 (28.6)            | 35 (71.4)                   |          |              |             |                   |
| Former Smoker                        | 21  | 5 (23.8)             | 16 (76.2)                   |          |              |             |                   |
| <b>Alcoholic drinking</b>            |     |                      |                             |          |              |             |                   |
| Drinker                              | 38  | 16 (42.1)            | 22 (57.9)                   | -        | 0.134        | -           | -                 |
| Non-drinker                          | 61  | 15 (24.6)            | 46 (75.4)                   |          |              |             |                   |
| Former Drinker                       | 2   | 1 (50.0)             | 1 (50.0)                    |          |              |             |                   |
| <b>Type of Psoriasis</b>             |     |                      |                             |          |              |             |                   |
| Plaque                               | 74  | 27 (36.5)            | 47 (63.5)                   | -        | 0.633*       | -           | -                 |
| Pustular                             | 5   | 1 (20.0)             | 4 (80.0)                    |          |              |             |                   |
| Inverse                              | 1   | 0 (0.0)              | 1 (100.0)                   |          |              |             |                   |
| Guttate                              | 5   | 1 (20.0)             | 4 (80.0)                    |          |              |             |                   |
| Plaque and guttate                   | 12  | 2 (16.7)             | 10 (83.3)                   |          |              |             |                   |
| Plaque and inverse                   | 2   | 0 (0.0)              | 2 (100.0)                   |          |              |             |                   |
| Plaque and pustular                  | 1   | 1 (100.0)            | 0 (0.0)                     |          |              |             |                   |
| Plaque, guttate and inverse          | 1   | 0 (0.0)              | 1 (100.0)                   |          |              |             |                   |
| <b>Localization</b>                  |     |                      |                             |          |              |             |                   |
| <b>Trunk and limbs</b>               |     |                      |                             |          |              |             |                   |
| Yes                                  | 93  | 29 (31.2)            | 64 (68.8)                   | -        | 0.706*       | -           | -                 |
| No                                   | 8   | 3 (37.5)             | 5 (62.5)                    |          |              |             |                   |
| <b>Scalp and face</b>                |     |                      |                             |          |              |             |                   |
| Yes                                  | 77  | 25 (32.5)            | 52 (67.5)                   | 0.092    | 0.762        | -           | -                 |
| No                                   | 24  | 7 (29.2)             | 17 (70.8)                   |          |              |             |                   |
| <b>Nails</b>                         |     |                      |                             |          |              |             |                   |
| Yes                                  | 58  | 14 (24.1)            | 44 (75.9)                   | 3.583    | <b>0.058</b> | <b>2.24</b> | <b>0.89-5.81</b>  |
| No                                   | 43  | 18 (41.9)            | 25 (58.1)                   |          |              | <b>1</b>    | -                 |
| <b>Palmoplantar</b>                  |     |                      |                             |          |              |             |                   |
| Yes                                  | 19  | 7 (36.8)             | 12 (63.2)                   | 0.288    | 0.592        | -           | -                 |
| No                                   | 82  | 25 (30.5)            | 57 (69.5)                   |          |              |             |                   |
| <b>Flexures</b>                      |     |                      |                             |          |              |             |                   |
| Yes                                  | 28  | 8 (28.6)             | 20 (71.4)                   | 0.173    | 0.677        | -           | -                 |
| No                                   | 73  | 24 (32.9)            | 49 (67.1)                   |          |              |             |                   |
| <b>Development of PSA</b>            |     |                      |                             |          |              |             |                   |
| Yes                                  | 31  | 3 (9.7)              | 28 (90.3)                   | 10.007   | <b>0.002</b> | <b>6.60</b> | <b>2.08-29.44</b> |
| No                                   | 70  | 29 (41.4)            | 41 (58.6)                   |          |              | <b>1</b>    | -                 |
| <b>Comorbidities</b>                 |     |                      |                             |          |              |             |                   |
| Yes                                  | 57  | 14 (24.6)            | 43 (75.4)                   | 3.066    | 0.079        | -           | -                 |
| No                                   | 44  | 18 (40.9)            | 26 (59.1)                   |          |              |             |                   |
| <b>Age of onset of MTX</b>           | 101 | 46.1916.13±          | 45.3314.25±                 | -        | 0.798        | -           | -                 |
| <b>MTX therapy duration (months)</b> | 101 | 14.5<br>(8.75-23.25) | 15.0<br>(5.0-37.0)          | -        | 0.345        | -           | -                 |

[illegible]
