# Supplementary material for: ABCC1, ABCG2 and FOXP3: Predictive Biomarkers of Toxicity from Methotrexate Treatment in Patients Diagnosed with Moderate-to-Severe Psoriasis
Source: MDPI journal article supplement (doi:10.3390/biomedicines11092567), 2023-09-19
Supplement: s1 [file s1]

**Table S19. Single nucleotide polymorphisms and gastrointestinal toxicity.**

| Gene  | SNP        | Genotype | N  | Gastrointestinal toxicity |                             | $\chi^2$ | p-value | OR | IC <sub>95%</sub> |
|-------|------------|----------|----|---------------------------|-----------------------------|----------|---------|----|-------------------|
|       |            |          |    | NO<br>N (%)               | YES<br>(Grado 1-4)<br>N (%) |          |         |    |                   |
| ABCC1 | rs246240   | AA       | 74 | 54(73.0)                  | 20(27.0)                    | -        | 0.825*  | -  | -                 |
|       |            | AG       | 24 | 16(66.7)                  | 8(33.3)                     |          |         |    |                   |
|       |            | GG       | 3  | 2(66.7)                   | 1(33.3)                     |          |         |    |                   |
|       |            | A        | 98 | 70(71.4)                  | 28(28.6)                    | -        | 1*      | -  | -                 |
|       |            | G        | 27 | 18(66.7)                  | 9(33.3)                     | 0.384    | 0.535   | -  | -                 |
|       | rs35592    | CC       | 3  | 2(66.7)                   | 1(33.3)                     | -        | 0.492*  | -  | -                 |
|       |            | CT       | 40 | 31(77.5)                  | 9(22.5)                     |          |         |    |                   |
|       |            | TT       | 58 | 39(67.2)                  | 19(32.8)                    |          |         |    |                   |
|       |            | C        | 43 | 33(76.7)                  | 10(23.3)                    | 1.089    | 0.297   | -  | -                 |
|       |            | T        | 98 | 70(71.4)                  | 28(28.6)                    | -        | 1*      | -  | -                 |
|       | rs2238476  | GG       | 91 | 67(73.6)                  | 24(26.4)                    | -        | 0.145*  | -  | -                 |
|       |            | AG       | 10 | 5(50.0)                   | 5(50.0)                     |          |         |    |                   |
|       |            | A        | 10 | 5(50.0)                   | 5(50.0)                     | 2.457    | 0.117   | -  | -                 |
| ABCG2 | rs13120400 | TT       | 53 | 39(73.6)                  | 14(26.4)                    | 3.559    | 0.169   | -  | -                 |
|       |            | CT       | 42 | 27(64.3)                  | 15(35.7)                    |          |         |    |                   |
|       |            | CC       | 6  | 6(100.0)                  | 0(0.0)                      |          |         |    |                   |
|       |            | T        | 95 | 66(69.5)                  | 29(30.5)                    | -        | 0.173*  | -  | -                 |
|       |            | C        | 48 | 33(68.8)                  | 15(31.2)                    | 0.288    | 0.592   | -  | -                 |
| FOXP3 | rs3761548  | GG       | 32 | 24 (75.0)                 | 8 (25.0)                    | 1.689    | 0.429   | -  | -                 |
|       |            | GT       | 29 | 18 (62.1)                 | 11 (37.9)                   |          |         |    |                   |
|       |            | TT       | 40 | 30 (75.0)                 | 10 (25.0)                   |          |         |    |                   |
|       |            | G        | 61 | 42 (68.9)                 | 19 (31.1)                   | 0.446    | 0.504   | -  | -                 |
|       |            | T        | 69 | 48 (69.6)                 | 21 (30.4)                   | 0.315    | 0.574   | -  | -                 |

\*P-value by Fisher's test.
