# Supplementary material for: ABCC1, ABCG2 and FOXP3: Predictive Biomarkers of Toxicity from Methotrexate Treatment in Patients Diagnosed with Moderate-to-Severe Psoriasis
Source: MDPI journal article supplement (doi:10.3390/biomedicines11092567), 2023-09-19
Supplement: s1 [file s1]

**Table S22. Single nucleotide polymorphisms and neurotoxicity.**

| Gene  | SNP        | Genotype | N  | Neurotoxicity |                             | $\chi^2$ | p-value | OR | IC <sub>95%</sub> |
|-------|------------|----------|----|---------------|-----------------------------|----------|---------|----|-------------------|
|       |            |          |    | NO<br>N (%)   | YES<br>(Grade 1-4)<br>N (%) |          |         |    |                   |
| ABCC1 | rs246240   | AA       | 74 | 66(89.2)      | 8(10.8)                     | -        | 0.583*  | -  | -                 |
|       |            | AG       | 24 | 23(95.8)      | 1(4.2)                      |          |         |    |                   |
|       |            | GG       | 3  | 3(100.0)      | 0(0.0)                      |          |         |    |                   |
|       |            | A        | 98 | 89(90.8)      | 9(9.2)                      |          |         |    |                   |
|       |            | G        | 27 | 26(96.3)      | 1(3.7)                      |          |         |    |                   |
|       | rs35592    | CC       | 3  | 3(100.0)      | 0(0.0)                      | -        | 1*      | -  | -                 |
|       |            | CT       | 40 | 36(90.0)      | 4(10.0)                     |          |         |    |                   |
|       |            | TT       | 58 | 53(91.4)      | 5(8.6)                      |          |         |    |                   |
|       |            | C        | 43 | 39(90.7)      | 4(9.3)                      |          |         |    |                   |
|       |            | T        | 98 | 89(90.8)      | 9(9.2)                      |          |         |    |                   |
|       | rs2238476  | GG       | 91 | 84(92.3)      | 7(7.7)                      | -        | 0.218*  | -  | -                 |
|       |            | AG       | 10 | 8(80.0)       | 2(20.0)                     |          |         |    |                   |
|       |            | A        | 10 | 8(80.0)       | 2(20.0)                     |          |         |    |                   |
| ABCG2 | rs13120400 | TT       | 53 | 48(90.6)      | 5(9.4)                      | -        | 1*      | -  | -                 |
|       |            | CT       | 42 | 38(90.5)      | 4(9.5)                      |          |         | -  | -                 |
|       |            | CC       | 6  | 6(100.0)      | 0(0.0)                      |          |         | -  | -                 |
|       |            | T        | 95 | 86(90.5)      | 9(9.5)                      |          |         | -  | -                 |
|       |            | C        | 48 | 44(91.7)      | 4(8.3)                      |          |         | -  | -                 |
| FOXP3 | rs3761548  | GG       | 40 | 37 (92.5)     | 3 (7.5)                     | -        | 0.614*  | -  | -                 |
|       |            | GT       | 29 | 25 (86.2)     | 4 (13.8)                    |          |         | -  | -                 |
|       |            | TT       | 32 | 30 (93.8)     | 2 (6.2)                     |          |         | -  | -                 |
|       |            | G        | 61 | 55 (90.2)     | 6 (9.8)                     |          |         | -  | -                 |
|       |            | T        | 69 | 62 (89.9)     | 7 (10.1)                    |          |         | -  | -                 |

\*p-value by Fisher's test.
