# Supplementary material for: ABCC1, ABCG2 and FOXP3: Predictive Biomarkers of Toxicity from Methotrexate Treatment in Patients Diagnosed with Moderate-to-Severe Psoriasis
Source: MDPI journal article supplement (doi:10.3390/biomedicines11092567), 2023-09-19
Supplement: s1 [file s1]

Table S23. Single nucleotide polymorphisms and cutaneous toxicity.

| Gene         | SNP        | Genotype | N  | Cutaneous toxicity |                             | $\chi^2$ | p-value | OR | IC <sub>95%</sub> |
|--------------|------------|----------|----|--------------------|-----------------------------|----------|---------|----|-------------------|
|              |            |          |    | NO<br>N (%)        | YES<br>(Grade 1-4)<br>N (%) |          |         |    |                   |
| <i>ABCC1</i> | rs246240   | AA       | 74 | 70(94.6)           | 4(5.4)                      | -        | 0.165*  | -  | -                 |
|              |            | AG       | 24 | 20(83.3)           | 4(16.7)                     |          |         |    |                   |
|              |            | GG       | 3  | 3(100.0)           | 0(0.0)                      |          |         |    |                   |
|              |            | A        | 98 | 90(91.8)           | 8(8.2)                      | -        | 1*      | -  | -                 |
|              |            | G        | 27 | 23(85.2)           | 4(14.8)                     | -        | 0.205*  | -  | -                 |
|              | rs35592    | CC       | 3  | 2(66.7)            | 1(33.3)                     | -        | 0.153*  | -  | -                 |
|              |            | CT       | 40 | 36(90.0)           | 4(10.0)                     |          |         |    |                   |
|              |            | TT       | 58 | 55(94.8)           | 3(5.2)                      |          |         |    |                   |
|              |            | C        | 43 | 38(88.4)           | 5(11.6)                     | -        | 0.280*  | -  | -                 |
|              |            | T        | 98 | 91(92.9)           | 7(7.1)                      | -        | 0.221*  | -  | -                 |
|              | rs2238476  | GG       | 91 | 83(91.2)           | 8(8.8)                      | -        | 1*      | -  | -                 |
|              |            | AG       | 10 | 10(100.0)          | 0(0.0)                      |          |         |    |                   |
|              |            | A        | 10 | 10(100.0)          | 0(0.0)                      | -        | 1*      | -  | -                 |
| <i>ABCG2</i> | rs13120400 | TT       | 53 | 47(88.7)           | 6(11.3)                     | -        | 0.125*  | -  | -                 |
|              |            | CT       | 42 | 41(97.6)           | 1(2.4)                      |          |         | -  | -                 |
|              |            | CC       | 6  | 5(83.3)            | 1(16.7)                     |          |         | -  | -                 |
|              |            | T        | 95 | 88(92.6)           | 7(7.4)                      | -        | 0.399*  | -  | -                 |
|              |            | C        | 48 | 46(95.8)           | 2(4.2)                      | -        | 0.274*  | -  | -                 |
| <i>FOXP3</i> | rs3761548  | GG       | 40 | 36 (90.0)          | 4 (10.0)                    | -        | 0.902*  | -  | -                 |
|              |            | GT       | 29 | 27 (93.1)          | 2 (6.9)                     |          |         | -  | -                 |
|              |            | TT       | 32 | 30 (93.8)          | 2 (6.2)                     |          |         | -  | -                 |
|              |            | G        | 61 | 57 (93.4)          | 4 (6.6)                     | -        | 0.709*  | -  | -                 |
|              |            | T        | 69 | 63 (61.3)          | 6 (8.7)                     | -        | 1*      | -  | -                 |

\*p-value by Fisher's test.
