# Supplementary material for: ABCC1, ABCG2 and FOXP3: Predictive Biomarkers of Toxicity from Methotrexate Treatment in Patients Diagnosed with Moderate-to-Severe Psoriasis
Source: MDPI journal article supplement (doi:10.3390/biomedicines11092567), 2023-09-19
Supplement: s1 [file s1]

Table S13. Linkage disequilibrium

| Chr | BP       | SNP     | Chr | BP       | SNP      | R <sup>2</sup> | D'     |
|-----|----------|---------|-----|----------|----------|----------------|--------|
| 16  | 16047966 | rs35592 | 16  | 16025167 | rs246240 | 0.2534         | 0.6545 |

*Chr: Chromosome; BP: Physical position (base-pair)*
