# Supplementary material for: ABCC1, ABCG2 and FOXP3: Predictive Biomarkers of Toxicity from Methotrexate Treatment in Patients Diagnosed with Moderate-to-Severe Psoriasis
Source: MDPI journal article supplement (doi:10.3390/biomedicines11092567), 2023-09-19
Supplement: s1 [file s1]

Table S6. Clinical variables and asthenia

| Characteristics             | N   | Asthenia            |                             | $\chi^2$ | p-value | OR | IC <sub>95%</sub> |
|-----------------------------|-----|---------------------|-----------------------------|----------|---------|----|-------------------|
|                             |     | NO<br>N (%)         | YES<br>(Grade 1-4)<br>N (%) |          |         |    |                   |
| <b>Gender</b>               | 101 |                     |                             |          |         |    |                   |
| Female                      | 52  | 34(65.4)            | 18(34.6)                    | 2.541    | 0.111   | -  | -                 |
| Male                        | 49  | 39(79.6)            | 10(20.4)                    |          |         |    |                   |
| <b>Age diagnosis PS</b>     | 101 | 27.0<br>(19.0-45.8) | 29.2<br>(15.8-41.7)         | -        | 0.635   | -  | -                 |
| <b>Family History of Ps</b> | 101 |                     |                             |          |         |    |                   |
| Yes                         | 52  | 38 (73.1)           | 14 (26.9)                   | 0.034    | 0.853   | -  | -                 |
| No                          | 49  | 35 (71.4)           | 14 (28.6)                   |          |         |    |                   |
| <b>Smoking</b>              | 101 |                     |                             |          |         |    |                   |
| Smoker                      | 31  | 23 (74.2)           | 8 (25.8)                    | 0.421    | 0.810   | -  | -                 |
| Non-smoking                 | 49  | 36 (73.5)           | 13 (26.5)                   |          |         |    |                   |
| Former Smoker               | 21  | 14 (66.7)           | 7 (33.3)                    |          |         |    |                   |
| <b>Alcoholic drinking</b>   | 101 |                     |                             |          |         |    |                   |
| Drinker                     | 38  | 31 (81.6)           | 7 (18.4)                    | -        | 0.198*  | -  | -                 |
| Non-drinker                 | 6   | 41 (67.2)           | 20 (32.8)                   |          |         |    |                   |
| Former Drinker              | 2   | 1 (50.0)            | 1 (50.0)                    |          |         |    |                   |
| <b>Type of Psoriasis</b>    | 101 |                     |                             |          |         |    |                   |
| Plaque                      | 74  | 57(77.0)            | 17(23.0)                    | -        | 0.340*  | -  | -                 |
| Pustular                    | 5   | 3(60.0)             | 2(40.0)                     |          |         |    |                   |
| Inverse                     | 1   | 1(100.0)            | 0(0.0)                      |          |         |    |                   |
| Guttate                     | 5   | 2(40.0)             | 3(60.0)                     |          |         |    |                   |
| Plaque and guttate          | 12  | 7(58.3)             | 5(41.7)                     |          |         |    |                   |
| Plaque and inverse          | 2   | 1(50.0)             | 1(50.0)                     |          |         |    |                   |
| Plaque and pustular         | 1   | 1(100.0)            | 0(0.0)                      |          |         |    |                   |
| Plaque, guttate and inverse | 1   | 1(100.0)            | 0(0.0)                      |          |         |    |                   |
| <b>Localization</b>         |     |                     |                             |          |         |    |                   |
| <b>Trunk and limbs</b>      | 101 |                     |                             |          |         |    |                   |
| Yes                         | 93  | 67(72.0)            | 26(28.0)                    | -        | 1*      | -  | -                 |
| No                          | 8   | 6(75.0)             | 2(25.0)                     |          |         |    |                   |
| <b>Scalp and face</b>       | 101 |                     |                             |          |         |    |                   |
| Yes                         | 77  | 54(70.1)            | 23(29.9)                    | 0.746    | 0.388   | -  | -                 |
| No                          | 24  | 19(79.2)            | 5(20.8)                     |          |         |    |                   |
| <b>Nails</b>                | 101 |                     |                             |          |         |    |                   |
| Yes                         | 58  | 40(69.0)            | 18(31.0)                    | 0.746    | 0.388   | -  | -                 |
| No                          | 43  | 33(76.7)            | 10(23.3)                    |          |         |    |                   |
| <b>Palmoplantar</b>         | 101 |                     |                             |          |         |    |                   |
| Yes                         | 19  | 14(73.7)            | 5(26.3)                     | 0.023    | 0.879   | -  | -                 |
| No                          | 82  | 59(72.0)            | 23(28.0)                    |          |         |    |                   |
| <b>Flexures</b>             | 101 |                     |                             |          |         |    |                   |
| Yes                         | 28  | 17 (60.7)           | 11 (39.3)                   | 2.585    | 0.108   | -  | -                 |
| No                          | 73  | 56 (76.7)           | 17 (23.3)                   |          |         |    |                   |
| <b>Development of PSA</b>   | 101 |                     |                             |          |         |    |                   |
| Yes                         | 31  | 19(61.3)            | 12(38.7)                    | 2.695    | 0.101   | -  | -                 |
| No                          | 70  | 54(77.1)            | 16(22.9)                    |          |         |    |                   |

|                                      |     |                  |                  |        |        |             |                   |
|--------------------------------------|-----|------------------|------------------|--------|--------|-------------|-------------------|
| <b>Comorbidities</b>                 | 101 |                  |                  |        |        |             |                   |
| Yes                                  | 57  | 39(68.4)         | 18(31.6)         | -      | 0.375* | -           | -                 |
| No                                   | 44  | 34(77.3)         | 10(22.7)         |        |        |             |                   |
| <b>Age of onset of MTX</b>           | 101 | 45.67±15.60      | 45.43±12.70      | -      | 0.936  | -           | -                 |
| <b>MTX therapy duration (months)</b> | 101 | 12.0 (6.0-29.0)  | 16.0 (4.0-36.3)  | -      | 0.467  | -           | -                 |
| <b>MTX Administration</b>            | 101 |                  |                  |        |        |             |                   |
| Oral                                 | 47  | 42 (89.4)        | 5 (10.6)         | 15.693 | <0.001 | <b>1</b>    | -                 |
| Subcutaneous                         | 30  | 20 (66.7)        | 10 (33.3)        |        |        | <b>4.20</b> | <b>1.31-15.04</b> |
| Both                                 | 24  | 11 (45.8)        | 13 (54.2)        |        |        | <b>9.93</b> | <b>3.07-36.90</b> |
| <b>Type of MTX therapy</b>           | 101 |                  |                  |        |        |             |                   |
| Monotherapy                          | 93  | 68 (73.1)        | 25 (26.9)        | 0.415  | 0.519  | -           | -                 |
| Combination Therapy                  | 8   | 5 (62.5)         | 2 (37.5)         |        |        |             |                   |
| <b>Maximum MTX dose (mg/week)</b>    | 101 | 12.5 (10.0-15.0) | 15.0 (10.0-15.6) | -      | 0.114  | -           | -                 |
| <b>Therapeutic adherence</b>         |     |                  |                  |        |        |             |                   |
| Adherent                             | 70  | 53 (75.7)        | 17 (24.3)        | -      | 0.444* | -           | -                 |
| Intentional non-adherent             | 30  | 19 (63.3)        | 11 (36.7)        |        |        |             |                   |
| Unintentional non-adherent           | 1   | 1 (100.0)        | 0 (0.0)          |        |        |             |                   |

\*p-value for the Fisher's test. PS: psoriasis; PSA: psoriatic arthritis
