# Supplementary material for: ABCC1, ABCG2 and FOXP3: Predictive Biomarkers of Toxicity from Methotrexate Treatment in Patients Diagnosed with Moderate-to-Severe Psoriasis
Source: MDPI journal article supplement (doi:10.3390/biomedicines11092567), 2023-09-19
Supplement: s1 [file s1]

**Table S18. Single nucleotide polymorphisms and hepatotoxicity.**

| Gene  | SNP        | Genotype | N  | Hepatotoxicity |                             | $\chi^2$ | p-value | OR   | IC <sub>95%</sub> |
|-------|------------|----------|----|----------------|-----------------------------|----------|---------|------|-------------------|
|       |            |          |    | NO<br>N (%)    | YES<br>(Grade 1-4)<br>N (%) |          |         |      |                   |
| ABCC1 | rs246240   | AA       | 74 | 46(62.2)       | 28(37.8)                    | -        | 0.945*  | -    | -                 |
|       |            | AG       | 24 | 16(66.7)       | 8(33.3)                     |          |         |      |                   |
|       |            | GG       | 3  | 2(66.7)        | 1(33.3)                     |          |         |      |                   |
|       |            | A        | 98 | 62(63.3)       | 36(36.7)                    | -        | 1*      | -    | -                 |
|       |            | G        | 27 | 18(66.7)       | 9(33.3)                     | 0.173    | 0.678   | -    | -                 |
|       | rs35592    | CC       | 3  | 3(100.0)       | 0(0.0)                      | -        | 0.369*  |      |                   |
|       |            | CT       | 40 | 23(57.5)       | 17(42.5)                    |          |         |      |                   |
|       |            | TT       | 58 | 38(65.5)       | 20(34.5)                    |          |         |      |                   |
|       |            | C        | 43 | 26(60.5)       | 17(39.5)                    | 0.272    | 0.602   | -    | -                 |
|       |            | T        | 98 | 61(62.2)       | 37(37.8)                    | -        | 0.297*  | -    | -                 |
|       | rs2238476  | GG       | 91 | 56(61.5)       | 35(38.5)                    | -        | 0.318*  | -    | -                 |
|       |            | AG       | 10 | 8(80.0)        | 2(20.0)                     |          |         |      |                   |
|       |            | A        | 10 | 8(80.0)        | 2(20.0)                     | -        | 0.318*  | -    | -                 |
| ABCG2 | rs13120400 | TT       | 53 | 29(54.7)       | 24(45.3)                    | 5.760    | 0.056   | -    | -                 |
|       |            | CT       | 42 | 29(69.0)       | 13(31.0)                    |          |         |      |                   |
|       |            | CC       | 6  | 6(100.0)       | 0(0.0)                      |          |         |      |                   |
|       |            | T        | 95 | 58(61.1)       | 37(38.9)                    | -        | 0.083*  | -    | -                 |
|       |            | C        | 48 | 35(72.9)       | 13(27.1)                    | 3.594    | 0.058   | 0.44 | 0.19-1.02         |
| FOXP3 | rs3761548  | GG       | 32 | 20 (62.5)      | 12 (37.5)                   | 0.586    | 0.746   | -    | -                 |
|       |            | GT       | 29 | 17 (58.6)      | 12 (41.4)                   |          |         |      |                   |
|       |            | TT       | 40 | 27 (67.5)      | 13 (32.5)                   |          |         |      |                   |
|       |            | G        | 61 | 37 (60.7)      | 24 (39.3)                   | 0.488    | 0.485   | -    | -                 |
|       |            | T        | 69 | 44 (63.8)      | 25 (36.2)                   | 0.015    | 0.902   | -    | -                 |

\*p-value by Fisher's test.
