# Supplementary material for: ABCC1, ABCG2 and FOXP3: Predictive Biomarkers of Toxicity from Methotrexate Treatment in Patients Diagnosed with Moderate-to-Severe Psoriasis
Source: MDPI journal article supplement (doi:10.3390/biomedicines11092567), 2023-09-19
Supplement: s1 [file s1]

**Table S2. Clinical variables and more than 1 adverse event**

| Characteristics             | N   | More than 1 adverse event |                          | $\chi^2$ | p-value      | OR          | IC <sub>95%</sub> |
|-----------------------------|-----|---------------------------|--------------------------|----------|--------------|-------------|-------------------|
|                             |     | NO<br>N (%)               | YES (Grade 1-4)<br>N (%) |          |              |             |                   |
| <b>Gender</b>               | 101 |                           |                          |          |              |             |                   |
| Female                      | 52  | 27 (51.9)                 | 25 (48.1)                | 7.223    | <b>0.007</b> | <b>3.20</b> | <b>1.37-7.82</b>  |
| Male                        | 49  | 38 (77.6)                 | 11 (22.4)                |          |              | <b>1</b>    | -                 |
| <b>Age diagnosis PS</b>     | 101 | 28.5<br>(19.3-45.8)       | 25.6<br>(13.6-41.7)      | -        | 0.326        | -           | -                 |
| <b>Family History of Ps</b> | 101 |                           |                          |          |              |             |                   |
| Yes                         | 52  | 36 (69.2)                 | 16 (30.8)                | 1.11     | 0.292        | -           | -                 |
| No                          | 49  | 29 (59.2)                 | 20 (40.8)                |          |              |             |                   |
| <b>Smoking</b>              | 101 |                           |                          |          |              |             |                   |
| Smoker                      | 31  | 25 (80.6)                 | 6 (19.4)                 | 7.843    | <b>0.019</b> | <b>1</b>    | -                 |
| Non-smoking                 | 49  | 31 (63.3)                 | 18 (36.7)                |          |              | <b>2.42</b> | <b>0.87-7.51</b>  |
| Former Smoker               | 21  | 9 (42.9)                  | 12 (57.1)                |          |              | <b>5.56</b> | <b>1.67-20.48</b> |
| <b>Alcoholic drinking</b>   | 101 |                           |                          |          |              |             |                   |
| Drinker                     | 38  | 29 (76.3)                 | 9 (23.7)                 | -        | 0.094*       | -           | -                 |
| Non-drinker                 | 61  | 35 (57.4)                 | 26 (42.6)                |          |              |             |                   |
| Former Drinker              | 2   | 1 (50.0)                  | 1 (50.0)                 |          |              |             |                   |
| <b>Type of Psoriasis</b>    | 101 |                           |                          |          |              |             |                   |
| Plaque                      | 74  | 48(64.9)                  | 26(35.1)                 | -        | 0.949*       | -           | -                 |
| Pustular                    | 5   | 3(60.0)                   | 2(40.0)                  |          |              |             |                   |
| Inverse                     | 1   | 1(100.0)                  | 0(0.0)                   |          |              |             |                   |
| Guttate                     | 5   | 2(40.0)                   | 3(60.0)                  |          |              |             |                   |
| Plaque and guttate          | 12  | 8(66.7)                   | 4(33.3)                  |          |              |             |                   |
| Plaque and inverse          | 2   | 1(50.0)                   | 1(50.0)                  |          |              |             |                   |
| Plaque and pustular         | 1   | 1(100.0)                  | 0(0.0)                   |          |              |             |                   |
| Plaque, guttate and inverse | 1   | 1(100.0)                  | 0(0.0)                   |          |              |             |                   |
| <b>Localization</b>         |     |                           |                          |          |              |             |                   |
| <b>Trunk and limbs</b>      | 101 |                           |                          |          |              |             |                   |
| Yes                         | 93  | 59(63.4)                  | 34(36.6)                 | -        | 0.708*       | -           | -                 |
| No                          | 8   | 6(75.0)                   | 2(25.0)                  |          |              |             |                   |
| <b>Scalp and face</b>       | 101 |                           |                          |          |              |             |                   |
| Yes                         | 77  | 48(62.3)                  | 29(37.7)                 | 0.576    | 0.448        | -           | -                 |
| No                          | 24  | 17(70.8)                  | 7(29.2)                  |          |              |             |                   |
| <b>Nails</b>                | 101 |                           |                          |          |              |             |                   |
| Yes                         | 58  | 33(56.9)                  | 25(43.1)                 | 3.305    | 0.069        | -           | -                 |
| No                          | 43  | 32(74.4)                  | 11(25.6)                 |          |              |             |                   |
| <b>Palmoplantar</b>         | 101 |                           |                          |          |              |             |                   |
| Yes                         | 19  | 14(73.7)                  | 5(26.3)                  | 0.887    | 0.346        | -           | -                 |
| No                          | 82  | 51(62.2)                  | 31(37.8)                 |          |              |             |                   |
| <b>Flexures</b>             | 101 |                           |                          |          |              |             |                   |
| Yes                         | 28  | 14 (50.0)                 | 14 (50.0)                | 3.481    | <b>0.062</b> | <b>2.31</b> | <b>0.94-5.72</b>  |
| No                          | 73  | 51 (69.9)                 | 22 (30.1)                |          |              | <b>1</b>    | -                 |
| <b>Development of PSA</b>   | 101 |                           |                          |          |              |             |                   |
| Yes                         | 31  | 14(45.2)                  | 17(54.8)                 | 7.185    | <b>0.007</b> | <b>3.26</b> | <b>1.36-8.01</b>  |
| No                          | 70  | 51(72.9)                  | 19(27.1)                 |          |              | <b>1</b>    | -                 |
| <b>Comorbidities</b>        | 101 |                           |                          |          |              |             |                   |

|                                      |     |                     |                     |        |              |              |                   |
|--------------------------------------|-----|---------------------|---------------------|--------|--------------|--------------|-------------------|
|                                      |     |                     |                     |        |              |              |                   |
| Yes                                  | 57  | 33 (57.9)           | 24 (42.1)           | 2.381  | 0.123        | -            | -                 |
| No                                   | 44  | 32 (72.7)           | 12 (27.3)           |        |              |              |                   |
| <b>Age of onset of MTX</b>           | 101 | 46.52±15.53         | 43.94±13.42         | -      | 0.385        | -            | -                 |
| <b>MTX therapy duration (months)</b> | 101 | 12.0<br>(5.0-24.0)  | 17.0<br>(4.8-42.8)  | -      | <b>0.063</b> | <b>1.02</b>  | <b>1.00-1.04</b>  |
| <b>MTX Administration</b>            | 101 |                     |                     |        |              |              |                   |
| Oral                                 | 47  | 40 (85.1)           | 7 (14.9)            | 22.026 | <0.001       | <b>1</b>     | -                 |
| Subcutaneous                         | 30  | 18 (60.0)           | 12 (40.0)           |        |              | <b>3.81</b>  | <b>1.32-11.81</b> |
| Both                                 | 24  | 7 (29.2)            | 17 (70.8)           |        |              | <b>13.88</b> | <b>4.45-49.21</b> |
| <b>Type of MTX therapy</b>           | 101 |                     |                     |        |              |              |                   |
| Monotherapy                          | 93  | 60 (64.5)           | 33 (35.5)           | 0.013  | 0.909        | -            | -                 |
| Combination Therapy                  | 8   | 5 (62.5)            | 3 (37.5)            |        |              |              |                   |
| <b>Maximum MTX dose (mg/week)</b>    | 101 | 15.0<br>(10.0-15.0) | 12.5<br>(10.0-15.0) | -      | 0.865        | -            | -                 |
| <b>Therapeutic adherence</b>         | 101 |                     |                     |        |              |              |                   |
| Adherent                             | 70  | 49 (70.0)           | 21 (30.0)           | -      | 0.107*       | -            | -                 |
| Intentional non-adherent             | 30  | 15 (50.0)           | 15 (50.0)           |        |              |              |                   |
| Unintentional non-adherent           | 1   | 1 (100.0)           | 0 (0.0)             |        |              |              |                   |

\*p-value for Fisher's test  
PS: psoriasis; PSA: psoriatic arthritis
