# Supplementary material for: ABCC1, ABCG2 and FOXP3: Predictive Biomarkers of Toxicity from Methotrexate Treatment in Patients Diagnosed with Moderate-to-Severe Psoriasis
Source: MDPI journal article supplement (doi:10.3390/biomedicines11092567), 2023-09-19
Supplement: s1 [file s1]

**Table S15. Single nucleotide polymorphisms and overall toxicity.**

| Gene  | SNP        | Genotype | N  | Overall toxicity |                             | $\chi^2$ | p-value | OR    | IC <sub>95%</sub> |
|-------|------------|----------|----|------------------|-----------------------------|----------|---------|-------|-------------------|
|       |            |          |    | NO<br>N (%)      | YES<br>(Grado 1-4)<br>N (%) |          |         |       |                   |
| ABCC1 | rs246240   | AA       | 74 | 23 (31.1)        | 51 (68.9)                   | -        | 1*      | -     | -                 |
|       |            | AG       | 24 | 8(33.3)          | 16(66.7)                    |          |         |       |                   |
|       |            | GG       | 3  | 1(33.3)          | 2(66.7)                     |          |         |       |                   |
|       |            | A        | 98 | 31(31.6)         | 67(68.4)                    | -        | 1*      | -     | -                 |
|       |            | G        | 27 | 9(33.3)          | 18(66.7)                    | 0.046    | 0.829   | -     | -                 |
|       | rs35592    | CC       | 3  | 1(33.3)          | 2(66.7)                     | -        | 0.922*  | -     | -                 |
|       |            | CT       | 40 | 12(30.0)         | 28(70.0)                    |          |         |       |                   |
|       |            | TT       | 58 | 19(32.8)         | 39(67.2)                    |          |         |       |                   |
|       |            | C        | 43 | 13(30.2)         | 30(69.8)                    | 0.073    | 0.787   | -     | -                 |
|       |            | T        | 98 | 31(31.6)         | 67(68.4)                    | -        | 1*      | -     | -                 |
|       | rs2238476  | GG       | 91 | 29(31.9)         | 62(68.1)                    | -        | 1*      | -     | -                 |
|       |            | AG       | 10 | 3(30.0)          | 7(70.0)                     |          |         |       |                   |
|       |            | A        | 10 | 3 (30.0)         | 7 (70.0)                    | -        | 1*      | -     | -                 |
| ABCG2 | rs13120400 | TT       | 53 | 14(26.4)         | 39(73.6)                    | -        | 0.023*  | 13.93 | 2.02-279.52       |
|       |            | CT       | 42 | 13(31.0)         | 29(69.0)                    |          |         | 11.15 | 1.59-225.34       |
|       |            | CC       | 6  | 5(83.3)          | 1(16.7)                     |          |         | 1     | -                 |
|       |            | T        | 95 | 27(28.4)         | 68(71.6)                    | -        | 0.012*  | 12.59 | 1.92-247.28       |
|       |            | C        | 48 | 18(37.5)         | 30(62.5)                    | 1.429    | 0.232   | -     | -                 |
| FOXP3 | rs3761548  | GG       | 32 | 10 (31.2)        | 22 (68.8)                   | 1.391    | 0.499   | -     | -                 |
|       |            | GT       | 29 | 7 (24.1)         | 22 (75.9)                   |          |         |       |                   |
|       |            | TT       | 40 | 15 (37.5)        | 25 (62.5)                   |          |         |       |                   |
|       |            | G        | 61 | 17 (27.9)        | 44 (72.1)                   | 1.035    | 0.309   | -     | -                 |
|       |            | T        | 69 | 22 (31.9)        | 47 (68.1)                   | 0.004    | 0.949   | -     | -                 |

\*p-value for Fisher's test.
