# Supplementary material for: ABCC1, ABCG2 and FOXP3: Predictive Biomarkers of Toxicity from Methotrexate Treatment in Patients Diagnosed with Moderate-to-Severe Psoriasis
Source: MDPI journal article supplement (doi:10.3390/biomedicines11092567), 2023-09-19
Supplement: s1 [file s1]

Table S25. Single nucleotide polymorphisms and infections.

| Gene         | SNP        | Genotype | N  | Infections  |                             | $\chi^2$ | p-value | OR | IC <sub>95%</sub> |
|--------------|------------|----------|----|-------------|-----------------------------|----------|---------|----|-------------------|
|              |            |          |    | NO<br>N (%) | YES<br>(Grado 1-4)<br>N (%) |          |         |    |                   |
| <i>ABCC1</i> | rs246240   | AA       | 74 | 69(93.2)    | 5(6.8)                      | -        | 1*      | -  | -                 |
|              |            | AG       | 24 | 23(95.8)    | 1(4.2)                      |          |         |    |                   |
|              |            | GG       | 3  | 3(100.0)    | 0(0.0)                      |          |         |    |                   |
|              |            | A        | 98 | 92(93.9)    | 6(6.1)                      | -        | 1*      | -  | -                 |
|              |            | G        | 27 | 26(96.3)    | 1(3.7)                      | -        | 1*      | -  | -                 |
|              | rs35592    | CC       | 3  | 3(100.0)    | 0(0.0)                      | -        | 0.4983* | -  | -                 |
|              |            | CT       | 40 | 39(97.5)    | 1(2.5)                      |          |         |    |                   |
|              |            | TT       | 58 | 53(91.4)    | 5(8.6)                      |          |         |    |                   |
|              |            | C        | 43 | 42(97.7)    | 1(2.3)                      | -        | 0.2363* | -  | -                 |
|              |            | T        | 98 | 92(93.9)    | 6(6.1)                      | -        | 1*      | -  | -                 |
|              | rs2238476  | GG       | 91 | 86(94.5)    | 5(5.5)                      | -        | 0.474*  | -  | -                 |
|              |            | AG       | 10 | 9(90.0)     | 1(10.0)                     |          |         |    |                   |
|              |            | A        | 10 | 9(90.0)     | 1(10.0)                     | -        | 0.474*  | -  | -                 |
| <i>ABCG2</i> | rs13120400 | TT       | 53 | 51(96.2)    | 2(3.8)                      | -        | 0.277*  | -  | -                 |
|              |            | CT       | 42 | 39(92.9)    | 3(7.1)                      |          |         | -  | -                 |
|              |            | CC       | 6  | 5(83.3)     | 1(16.7)                     |          |         | -  | -                 |
|              |            | T        | 95 | 90(94.7)    | 5(5.3)                      |          | 0.3142* | -  | -                 |
|              |            | C        | 48 | 44(91.7)    | 4(8.3)                      |          | 0.4197* | -  | -                 |
| <i>FOXP3</i> | rs3761548  | GG       | 32 | 30 (93.8)   | 2 (6.2)                     | -        | 1*      | -  | -                 |
|              |            | GT       | 29 | 27 (93.1)   | 2 (6.9)                     |          |         | -  | -                 |
|              |            | TT       | 40 | 38 (95.0)   | 2 (5.0)                     |          |         | -  | -                 |
|              |            | G        | 61 | 57 (93.4)   | 4 (6.6)                     | -        | 1*      | -  | -                 |
|              |            | T        | 69 | 65 (94.2)   | 4 (5.8)                     | -        | 1*      | -  | -                 |

\*p-value by Fisher's test.
