# Supplementary material for: ABCC1, ABCG2 and FOXP3: Predictive Biomarkers of Toxicity from Methotrexate Treatment in Patients Diagnosed with Moderate-to-Severe Psoriasis
Source: MDPI journal article supplement (doi:10.3390/biomedicines11092567), 2023-09-19
Supplement: s1 [file s1]

**Table S8. Clinical variables and skin toxicity.**

| Characteristics             | N   | Skin toxicity    |                             | $\chi^2$ | p-value | OR   | IC <sub>95%</sub> |
|-----------------------------|-----|------------------|-----------------------------|----------|---------|------|-------------------|
|                             |     | NO<br>N (%)      | YES<br>(Grade 1-4)<br>N (%) |          |         |      |                   |
| <b>Gender</b>               | 101 |                  |                             |          |         |      |                   |
| Female                      | 52  | 46(88.5)         | 6(11.5)                     | -        | 0.271*  | -    | -                 |
| Male                        | 49  | 47(95.9)         | 2(4.1)                      |          |         |      |                   |
| <b>Age diagnosis PS</b>     | 101 | 27.0 (18.4-44.3) | 29.3 (19.5-35.5)            | -        | 0.667   | -    | -                 |
| <b>Family History of Ps</b> | 101 |                  |                             |          |         |      |                   |
| Yes                         | 52  | 49 (94.2)        | 3 (5.8)                     | -        | 0.479*  | -    | -                 |
| No                          | 49  | 44 (89.8)        | 5 (10.2)                    |          |         |      |                   |
| <b>Smoking</b>              | 101 |                  |                             |          |         |      |                   |
| Smoker                      | 31  | 28 (90.3)        | 3 (9.7)                     | -        | 0.707*  | -    | -                 |
| Non-smoking                 | 49  | 46 (93.9)        | 3 (6.1)                     |          |         |      |                   |
| Former Smoker               | 21  | 19 (90.5)        | 2 (9.5)                     |          |         |      |                   |
| <b>Alcoholic drinking</b>   | 101 |                  |                             |          |         |      |                   |
| Drinker                     | 38  | 36 (94.7)        | 2 (5.3)                     | -        | 0.752*  | -    | -                 |
| Non-drinker                 | 61  | 55 (90.2)        | 6 (9.8)                     |          |         |      |                   |
| Former Drinker              | 2   | 2 (100.0)        | 0 (0.0)                     |          |         |      |                   |
| <b>Type of Psoriasis</b>    | 101 |                  |                             |          |         |      |                   |
| Plaque                      | 74  | 68(91.9)         | 6(8.1)                      | -        | 0.311*  | -    | -                 |
| Pustular                    | 5   | 5(100.0)         | 0(0.0)                      |          |         |      |                   |
| Inverse                     | 1   | 1(100.0)         | 0(0.0)                      |          |         |      |                   |
| Guttate                     | 5   | 3(60.0)          | 2(40.0)                     |          |         |      |                   |
| Plaque and guttate          | 12  | 12(100.0)        | 0(0.0)                      |          |         |      |                   |
| Plaque and inverse          | 2   | 2(100.0)         | 0(0.0)                      |          |         |      |                   |
| Plaque and pustular         | 1   | 1(100.0)         | 0(0.0)                      |          |         |      |                   |
| Plaque, guttate and inverse | 1   | 1(100.0)         | 0(0.0)                      |          |         |      |                   |
| <b>Localization</b>         |     |                  |                             |          |         |      |                   |
| <b>Trunk and limbs</b>      | 101 |                  |                             |          |         |      |                   |
| Yes                         | 93  | 86(92.5)         | 7(7.5)                      | -        | 0.496*  | -    | -                 |
| No                          | 8   | 7(87.5)          | 1(12.5)                     |          |         |      |                   |
| <b>Scalp and face</b>       | 101 |                  |                             |          |         |      |                   |
| Yes                         | 77  | 72(93.5)         | 5(6.5)                      | -        | 0.391*  | -    | -                 |
| No                          | 24  | 21(87.5)         | 3(12.5)                     |          |         |      |                   |
| <b>Nails</b>                | 101 |                  |                             |          |         |      |                   |
| Yes                         | 58  | 54(93.1)         | 4(6.9)                      | -        | 0.720*  | -    | -                 |
| No                          | 43  | 39(90.7)         | 4(9.3)                      |          |         |      |                   |
| <b>Palmoplantar</b>         | 101 |                  |                             |          |         |      |                   |
| Yes                         | 19  | 19(100.0)        | 0(0.0)                      | -        | 0.346*  | -    | -                 |
| No                          | 82  | 74(90.2)         | 8(9.8)                      |          |         |      |                   |
| <b>Flexures</b>             | 101 |                  |                             |          |         |      |                   |
| Yes                         | 28  | 25 (89.3)        | 3 (10.7)                    | 0.415    | 0.519   | -    | -                 |
| No                          | 73  | 68 (93.2)        | 5 (6.8)                     |          |         |      |                   |
| <b>Development of PSA</b>   | 101 |                  |                             |          |         |      |                   |
| Yes                         | 31  | 25(80.6)         | 6(19.4)                     | -        | 0.009*  | 8.16 | 1.75-58.25        |
| No                          | 70  | 68(97.1)         | 2(2.9)                      |          |         | 1    | -                 |
| <b>Comorbidities</b>        | 101 |                  |                             |          |         |      |                   |

|                                      |     |                  |                  |       |        |   |   |
|--------------------------------------|-----|------------------|------------------|-------|--------|---|---|
|                                      |     |                  |                  |       |        |   |   |
| Yes                                  | 57  | 52(91.2)         | 5(8.8)           | -     | 1*     | - | - |
| No                                   | 44  | 41(93.2)         | 3(6.8)           |       |        |   |   |
| <b>Age of onset of MTX</b>           | 101 | 45.77±15.18      | 43.63±9.64       | -     | 0.579  | - | - |
| <b>MTX therapy duration (months)</b> | 101 | 15.0 (5.0-33.0)  | 5.0 (3.3-22.3)   | -     | 0.487  | - | - |
| <b>MTX Administration</b>            | 101 |                  |                  |       |        |   |   |
| Oral                                 | 47  | 45 (95.7)        | 2 (4.3)          | -     | 0.355* | - | - |
| Subcutaneous                         | 30  | 26 (86.7)        | 4 (13.3)         |       |        |   |   |
| Both                                 | 24  | 22 (91.7)        | 2 (8.3)          |       |        |   |   |
| <b>Type of MTX therapy</b>           | 101 |                  |                  |       |        |   |   |
| Monotherapy                          | 93  | 86 (92.5)        | 7 (7.5)          | 0.249 | 0.617  | - | - |
| Combination Therapy                  | 8   | 7 (87.5)         | 1 (12.5)         |       |        |   |   |
| <b>Maximum MTX dose (mg/week)</b>    | 101 | 12.5 (10.0-15.0) | 15.0 (10.0-15.0) | -     | 0.993  | - | - |
| <b>Therapeutic adherence</b>         |     |                  |                  |       |        |   |   |
| Adherent                             | 70  | 64 (91.4)        | 6 (8.6)          | -     | 1*     | - | - |
| Intentional non-adherent             | 30  | 28 (93.3)        | 2 (6.7)          |       |        |   |   |
| Unintentional non-adherent           | 1   | 1 (100.0)        | 0 (0.0)          |       |        |   |   |

\*p-value for the Fisher's test. PS: psoriasis; PSA: psoriatic arthritis
