# Supplementary material for: ABCC1, ABCG2 and FOXP3: Predictive Biomarkers of Toxicity from Methotrexate Treatment in Patients Diagnosed with Moderate-to-Severe Psoriasis
Source: MDPI journal article supplement (doi:10.3390/biomedicines11092567), 2023-09-19
Supplement: s1 [file s1]

Table S14. Minor allele frequencies of SNPs.

| Chr                                                 | SNP        | Minor Allele | Major Allele | MAF    |
|-----------------------------------------------------|------------|--------------|--------------|--------|
| 4                                                   | rs13120400 | C            | T            | 0.2673 |
| 16                                                  | rs35592    | C            | T            | 0.2277 |
| 16                                                  | rs2238476  | A            | G            | 0.0495 |
| 16                                                  | rs246240   | G            | A            | 0.1485 |
| 23                                                  | rs3761548  | G            | T            | 0.4803 |
| <i>Chr: Chromosome; MAF: Minor allele frequency</i> |            |              |              |        |
