# Supplementary material for: ABCC1, ABCG2 and FOXP3: Predictive Biomarkers of Toxicity from Methotrexate Treatment in Patients Diagnosed with Moderate-to-Severe Psoriasis
Source: MDPI journal article supplement (doi:10.3390/biomedicines11092567), 2023-09-19
Supplement: s1 [file s1]

**Table S5. Clinical variables and gastrointestinal toxicity.**

| Characteristics             | N   | Gastrointestinal toxicity |                             | $\chi^2$ | p-value       | OR          | IC <sub>95%</sub>  |
|-----------------------------|-----|---------------------------|-----------------------------|----------|---------------|-------------|--------------------|
|                             |     | NO<br>N (%)               | YES<br>(Grade 1-4)<br>N (%) |          |               |             |                    |
| <b>Gender</b>               | 101 |                           |                             |          |               |             |                    |
| Female                      | 52  | 32(61.5)                  | 20(38.5)                    | 4.977    | <b>0.026</b>  | <b>2.78</b> | <b>1.14-7.20</b>   |
| Male                        | 49  | 40(81.6)                  | 9(18.4)                     |          |               | <b>1</b>    | -                  |
| <b>Age diagnosis PS</b>     | 101 | 29.1<br>(19.2-45.6)       | 23.8<br>(13.8-40.5)         | -        | 0.247         | -           | -                  |
| <b>Family History of Ps</b> | 101 |                           |                             |          |               |             |                    |
| Yes                         | 52  | 37 (71.2)                 | 15 (28.8)                   | 0.001    | 0.976         | -           | -                  |
| No                          | 49  | 35 (71.4)                 | 14 (28.6)                   |          |               |             |                    |
| <b>Smoking</b>              | 101 |                           |                             |          |               |             |                    |
| Smoker                      | 31  | 26 (83.9)                 | 5 (16.1)                    | 8.259    | <b>0.016</b>  | <b>1</b>    | -                  |
| Non-smoking                 | 49  | 36 (73.5)                 | 13 (26.5)                   |          |               | <b>1.88</b> | <b>0.62-6.45</b>   |
| Former Smoker               | 21  | 10 (47.6)                 | 11 (52.4)                   |          |               | <b>5.72</b> | <b>1.66-22.34</b>  |
| <b>Alcoholic drinking</b>   | 101 |                           |                             |          |               |             |                    |
| Drinker                     | 38  | 33 (86.8)                 | 5 (13.2)                    | -        | <b>0.013*</b> | <b>1</b>    | -                  |
| Non-drinker                 | 61  | 38 (62.3)                 | 23 (37.7)                   |          |               | <b>3.99</b> | <b>1.46-12.96</b>  |
| Former Drinker              | 2   | 1 (50.0)                  | 1 (50.0)                    |          |               | <b>6.60</b> | <b>0.24-186.55</b> |
| <b>Type of Psoriasis</b>    | 101 |                           |                             |          |               |             |                    |
| Plaque                      | 74  | 57(77.0)                  | 17(33.0)                    | -        | 0.105*        | -           | -                  |
| Pustular                    | 5   | 2(40.0)                   | 3(60.0)                     |          |               |             |                    |
| Inverse                     | 1   | 1(100.0)                  | 0(0.0)                      |          |               |             |                    |
| Guttate                     | 5   | 2(40.0)                   | 3(60.0)                     |          |               |             |                    |
| Plaque and guttate          | 12  | 6(50.0)                   | 6(50.0)                     |          |               |             |                    |
| Plaque and inverse          | 2   | 2(100.0)                  | 0(0.0)                      |          |               |             |                    |
| Plaque and pustular         | 1   | 1(100.0)                  | 0(0.0)                      |          |               |             |                    |
| Plaque, guttate and inverse | 1   | 1(100.0)                  | 0(0.0)                      |          |               |             |                    |
| <b>Localization</b>         |     |                           |                             |          |               |             |                    |
| <b>Trunk and limbs</b>      | 101 |                           |                             |          |               |             |                    |
| Yes                         | 93  | 65(69.9)                  | 28(30.1)                    | -        | 0.433*        | -           | -                  |
| No                          | 8   | 7(87.5)                   | 1(12.5)                     |          |               |             |                    |
| <b>Scalp and face</b>       | 101 |                           |                             |          |               |             |                    |
| Yes                         | 77  | 53(68.8)                  | 24(31.2)                    | 0.955    | 0.329         | -           | -                  |
| No                          | 24  | 19(79.2)                  | 5(20.8)                     |          |               |             |                    |
| <b>Nails</b>                | 101 |                           |                             |          |               |             |                    |
| Yes                         | 58  | 37(63.8)                  | 21(36.2)                    | 3.738    | <b>0.053</b>  | <b>2.48</b> | <b>1.00-6.64</b>   |
| No                          | 43  | 35(81.4)                  | 8(18.6)                     |          |               | <b>1</b>    | -                  |
| <b>Palmoplantar</b>         | 101 |                           |                             |          |               |             |                    |
| Yes                         | 19  | 14(73.7)                  | 5(26.3)                     | 0.066    | 0.798         | -           | -                  |
| No                          | 82  | 58(70.7)                  | 24(29.3)                    |          |               |             |                    |
| <b>Flexures</b>             | 101 |                           |                             |          |               |             |                    |
| Yes                         | 28  | 23 (82.1)                 | 5 (17.9)                    | 2.230    | 0.135         | -           | -                  |
| No                          | 73  | 49 (67.1)                 | 24 (32.9)                   |          |               |             |                    |
| <b>Development of PSA</b>   | 101 |                           |                             |          |               |             |                    |
| Yes                         | 31  | 20(64.5)                  | 11(35.5)                    | 1.002    | 0.317         | -           | -                  |
| No                          | 70  | 52(74.3)                  | 18(25.7)                    |          |               |             |                    |
| <b>Comorbidities</b>        | 101 |                           |                             |          |               |             |                    |

|                                      |     |                  |                  |        |        |             |                   |
|--------------------------------------|-----|------------------|------------------|--------|--------|-------------|-------------------|
|                                      |     |                  |                  |        |        |             |                   |
| Yes                                  | 57  | 41(71.9)         | 16(29.5)         | 0.026  | 0.871  | -           | -                 |
| No                                   | 44  | 31(70.5)         | 13(29.5)         |        |        |             |                   |
| <b>Age of onset of MTX</b>           | 101 | 45.92±15.07      | 44.83±14.32      | -      | 0.735  | -           | -                 |
| <b>MTX therapy duration (months)</b> | 101 | 15.0 (5.8-29.5)  | 12.0 (5.0-38.0)  | -      | 0.559  | -           | -                 |
| <b>MTX Administration</b>            | 101 |                  |                  |        |        |             |                   |
| Oral                                 | 47  | 40 (85.1)        | 7 (14.9)         | 14.734 | 0.001  | <b>1</b>    | -                 |
| Subcutaneous                         | 30  | 22 (73.3)        | 8 (26.7)         |        |        | <b>2.08</b> | <b>0.66-6.68</b>  |
| Both                                 | 24  | 10 (41.7)        | 14 (58.3)        |        |        | <b>8.00</b> | <b>2.65-26.52</b> |
| <b>Type of MTX therapy</b>           | 101 |                  |                  |        |        |             |                   |
| Monotherapy                          | 93  | 66 (71.0)        | 27 (29.0)        | 0.059  | 0.809  | -           | -                 |
| Combination Therapy                  | 8   | 6 (75.0)         | 2 (25.0)         |        |        |             |                   |
| <b>Maximum MTX dose (mg/week)</b>    | 101 | 15.0 (10.0-15.0) | 12.5 (10.0-15.0) | -      | 0.585  | -           | -                 |
| <b>Therapeutic adherence</b>         | 101 |                  |                  |        |        |             |                   |
| Adherent                             | 70  | 53 (75.7)        | 17 (24.3)        | -      | 0.202* | -           | -                 |
| Intentional non-adherent             | 30  | 18 (60.0)        | 12 (40.0)        |        |        |             |                   |
| Unintentional non-adherent           | 1   | 1 (100.0)        | 0 (0.0)          |        |        |             |                   |

\*p-value for the Fisher's test. PS: psoriasis; PSA: psoriatic arthritis
