# Supplementary material for: ABCC1, ABCG2 and FOXP3: Predictive Biomarkers of Toxicity from Methotrexate Treatment in Patients Diagnosed with Moderate-to-Severe Psoriasis
Source: MDPI journal article supplement (doi:10.3390/biomedicines11092567), 2023-09-19
Supplement: s1 [file s1]

Table S3. Clinical variables and more than 2 adverse events.

| Characteristics             | N   | More than 2 adverse events |                             | $\chi^2$ | p-value      | OR          | IC <sub>95%</sub> |
|-----------------------------|-----|----------------------------|-----------------------------|----------|--------------|-------------|-------------------|
|                             |     | NO<br>N (%)                | YES<br>(Grade 1-4)<br>N (%) |          |              |             |                   |
| <b>Gender</b>               | 101 |                            |                             |          |              |             |                   |
| Female                      | 52  | 40(76.9)                   | 12(23.1)                    | 5.735    | <b>0.017</b> | <b>4.60</b> | <b>1.35-21.24</b> |
| Male                        | 49  | 46(93.9)                   | 3(6.1)                      |          |              | <b>1</b>    | -                 |
| <b>Age diagnosis PS</b>     | 101 | 27.1<br>(19.0-45.2)        | 28.8<br>(15.13-40.96)       | -        | 0.465        | -           | -                 |
| <b>Family History of Ps</b> | 101 |                            |                             |          |              |             |                   |
| Yes                         | 52  | 42 (80.8)                  | 10 (19.2)                   | 1.626    | 0.202        | -           | -                 |
| No                          | 49  | 44 (89.9)                  | 5 (10.2)                    |          |              |             |                   |
| <b>Smoking</b>              | 101 |                            |                             |          |              |             |                   |
| Smoker                      | 31  | 29 (93.5)                  | 2 (6.5)                     | -        | 0.197*       | -           | -                 |
| Non-smoking                 | 49  | 41 (83.7)                  | 8 (16.3)                    |          |              |             |                   |
| Former Smoker               | 21  | 16 (76.2)                  | 5 (23.8)                    |          |              |             |                   |
| <b>Alcoholic drinking</b>   | 101 |                            |                             |          |              |             |                   |
| Drinker                     | 38  | 35 (92.1)                  | 3 (7.9)                     | -        | 0.273*       | -           | -                 |
| Non-drinker                 | 61  | 49 (80.3)                  | 12 (19.7)                   |          |              |             |                   |
| Former Drinker              | 2   | 2 (100.0)                  | 0 (0.0)                     |          |              |             |                   |
| <b>Type of Psoriasis</b>    | 101 |                            |                             |          |              |             |                   |
| Plaque                      | 74  | 65(87.8)                   | 9(12.2)                     | -        | 0.166*       | -           | -                 |
| Pustular                    | 5   | 5(100.0)                   | 0(0.0)                      |          |              |             |                   |
| Inverse                     | 1   | 1(100.0)                   | 0(0.0)                      |          |              |             |                   |
| Guttate                     | 5   | 2(40.0)                    | 3(60.0)                     |          |              |             |                   |
| Plaque and guttate          | 12  | 9(75.0)                    | 3(25.0)                     |          |              |             |                   |
| Plaque and inverse          | 2   | 2(100.0)                   | 0(0.0)                      |          |              |             |                   |
| Plaque and pustular         | 1   | 1(100.0)                   | 0(0.0)                      |          |              |             |                   |
| Plaque, guttate and inverse | 1   | 1(100.0)                   | 0(0.0)                      |          |              |             |                   |
| <b>Localization</b>         |     |                            |                             |          |              |             |                   |
| <b>Trunk and limbs</b>      | 101 |                            |                             |          |              |             |                   |
| Yes                         | 93  | 79(84.9)                   | 14(15.1)                    | -        | 1*           | -           | -                 |
| No                          | 8   | 7(87.5)                    | 1(12.5)                     |          |              |             |                   |
| <b>Scalp and face</b>       | 101 |                            |                             |          |              |             |                   |
| Yes                         | 77  | 63(81.8)                   | 14(18.2)                    | -        | 0.111*       | -           | -                 |
| No                          | 24  | 23(95.8)                   | 1(4.2)                      |          |              |             |                   |
| <b>Nails</b>                | 101 |                            |                             |          |              |             |                   |
| Yes                         | 58  | 47(81.0)                   | 11(19.0)                    | 1.82     | 0.177        | -           | -                 |
| No                          | 43  | 39(90.7)                   | 4(9.3)                      |          |              |             |                   |
| <b>Palmoplantar</b>         | 101 |                            |                             |          |              |             |                   |
| Yes                         | 19  | 18(94.7)                   | 1(5.3)                      | -        | 0.291*       | -           | -                 |
| No                          | 82  | 68(82.9)                   | 14(17.1)                    |          |              |             |                   |
| <b>Flexures</b>             | 101 |                            |                             |          |              |             |                   |
| Yes                         | 73  | 64 (87.7)                  | 9 (12.3)                    | -        | 0.347*       | -           | -                 |
| No                          | 28  | 22 (78.6)                  | 6 (21.4)                    |          |              |             |                   |
| <b>Development of PSA</b>   | 101 |                            |                             |          |              |             |                   |
| Yes                         | 31  | 24(77.4)                   | 7(22.6)                     | -        | 0.223*       | -           | -                 |
| No                          | 70  | 62(88.6)                   | 8(11.4)                     |          |              |             |                   |
| <b>Comorbidities</b>        | 101 |                            |                             |          |              |             |                   |
| Yes                         | 57  | 50(87.7)                   | 7(12.3)                     | 0.684    | 0.408        | -           | -                 |
| No                          | 44  | 36(81.8)                   | 8(18.2)                     |          |              |             |                   |
| <b>Age of onset of MTX</b>  | 101 | 45.86±15.41                | 44.13±10.93                 | -        | 0.603        | -           | -                 |

|                                      |     |                     |                     |   |               |             |                   |
|--------------------------------------|-----|---------------------|---------------------|---|---------------|-------------|-------------------|
| <b>MTX therapy duration (months)</b> | 101 | 14.5<br>(5.0-32.5)  | 15.0<br>(4.5-33.5)  | - | 0.563         | -           | -                 |
| <b>MTX Administration</b>            | 101 |                     |                     |   |               |             |                   |
| Oral                                 | 47  | 44 (93.6)           | 3 (6.4)             | - | <b>0.038*</b> | <b>1</b>    | -                 |
| Subcutaneous                         | 30  | 25 (83.3)           | 5 (16.7)            |   |               | <b>2.93</b> | <b>0.66-15.29</b> |
| Both                                 | 24  | 17 (70.8)           | 7 (29.2)            |   |               | <b>6.04</b> | <b>1.49-30.62</b> |
| <b>Type of MTX therapy</b>           | 101 |                     |                     |   |               |             |                   |
| Monotherapy                          | 93  | 80 (86.0)           | 13 (14.0)           | - | 0.339*        | -           | -                 |
| Combination Therapy                  | 8   | 6 (75.0)            | 2 (25.0)            |   |               |             |                   |
| <b>Maximum MTX dose (mg/week)</b>    | 101 | 12.5<br>(10.0-15.0) | 15.0<br>(10.0-15.0) | - | 0.711         | -           | -                 |
| <b>Therapeutic adherence</b>         | 101 |                     |                     |   |               |             |                   |
| Adherent                             | 70  | 61 (87.1)           | 9 (12.9)            | - | 0.466*        | -           | -                 |
| Intentional non-adherent             | 30  | 24 (80.0)           | 6 (20.0)            |   |               |             |                   |
| Unintentional non-adherent           | 1   | 1 (100.0)           | 0 (0.0)             |   |               |             |                   |

\*p-value for the Fisher's test. PS: psoriasis; PSA: psoriatic arthritis
